1 **Compellingly high SARS-CoV-2 susceptibility of Golden Syrian hamsters suggests multiple**  
2 **zoonotic infections of pet hamsters during the COVID-19 pandemic**

3

4 Short title: Exceptional SARS-CoV-2 susceptibility of Syrian hamsters

5

6 Claudia Blaurock<sup>1</sup>, Angele Breithaupt<sup>2</sup>, Saskia Weber<sup>1</sup>, Claudia Wylezich<sup>3</sup>, Markus Keller<sup>1</sup>, Björn-  
7 Patrick Mohl<sup>1</sup>, Dirk Görlich<sup>4</sup>, Martin H. Groschup<sup>1</sup>, Balal Sadeghi<sup>1</sup>, Dirk Höper<sup>3</sup>, Thomas C.  
8 Mettenleiter<sup>5</sup>, Anne Balkema-Buschmann<sup>1\*</sup>

9

10 <sup>1</sup> Institute of Novel and Emerging Infectious Diseases, Friedrich-Loeffler-Institut, Greifswald-Insel  
11 Riems, Germany

12 <sup>2</sup> Department of Experimental Animal Facilities and Biorisk Management, Friedrich-Loeffler-  
13 Institut, Greifswald-Insel Riems, Germany

14 <sup>3</sup> Institute of Diagnostic Virology, Friedrich-Loeffler-Institut, Greifswald-Insel Riems, Germany

15 <sup>4</sup> Max Planck Institute for Multidisciplinary Sciences, Göttingen, Germany

16 <sup>5</sup> Friedrich-Loeffler-Institut, Federal Research Institute for Animal Health, Greifswald-Insel Riems,  
17 Germany

18 \* [anne.buschmann@fli.de](mailto:anne.buschmann@fli.de)

19

20

21 **Abstract**

22 Golden Syrian hamsters (*Mesocricetus auratus*) are used as a research model for severe  
23 acute respiratory syndrome coronavirus type 2 (SARS-CoV-2). Millions of Golden Syrian  
24 hamsters are also kept as pets in close contact to humans. To determine the minimum  
25 infective dose (MID) for assessing the zoonotic transmission risk, and to define the optimal  
26 infection dose for experimental studies, we orotracheally inoculated hamsters with SARS-  
27 CoV-2 doses from  $1 \times 10^5$  to  $1 \times 10^{-4}$  tissue culture infectious dose 50 (TCID<sub>50</sub>). Body weight  
28 and virus shedding were monitored daily.  $1 \times 10^{-3}$  TCID<sub>50</sub> was defined as the MID, and this  
29 was still sufficient to induce virus shedding at levels up to  $10^{2.75}$  TCID<sub>50</sub>/ml, equaling the  
30 estimated MID for humans. Virological and histological data revealed  $1 \times 10^2$  TCID<sub>50</sub> as the  
31 optimal dose for experimental infections. This compellingly high susceptibility resulting in  
32 productive infections in Golden Syrian hamsters needs to be considered also as a source of  
33 SARS-CoV-2 infections in humans.

34

## 35 Introduction

36 To date, more than 499 million confirmed Coronavirus Disease 2019 (COVID-19) cases  
37 and more than 6.1 million deaths have been reported globally since the initial detection of  
38 severe acute respiratory syndrome coronavirus 2 (SARS-CoV-2) in December 2019  
39 (<https://coronavirus.jhu.edu>; 12.04.2022). COVID-19 has been studied extensively since,  
40 and the incubation time in humans has been calculated as 6.4 days for the initially described  
41 virus variants (Cheng et al., 2021; Elias, Sekri, Leblanc, Cucherat, & Vanhems, 2021), while  
42 the estimated minimum infective dose (MID) for humans has been calculated to be  
43 approximately  $10^2$  tissue culture infectious dose 50 (TCID<sub>50</sub>) (Basu, 2021; Karimzadeh,  
44 Bhopal, & Nguyen Tien, 2021).

45 Golden Syrian hamsters (*Mesocricetus auratus*) are widely used as a COVID-19 animal  
46 model, as they efficiently support SARS-CoV-2 replication and display pathological  
47 manifestations similar to human COVID-19 pneumonia, such as focal diffuse alveolar  
48 destruction, hyaline membrane formation, and mononuclear cell infiltration (Chan et al.,  
49 2020; Sia et al., 2020). Efficient transmission from inoculated to naïve hamsters by direct  
50 contact and aerosol has also been reported (Dowall et al., 2021; Sia et al., 2020). Several  
51 hamster species are kept as pets in millions of households worldwide. These include Golden  
52 Syrian hamsters, Chinese hamsters (*Cricetulus griseus*), and three Dwarf hamster species  
53 (*Phodopus roborowskii*, *P. campbelli* and *P. sungorus*). According to the German Pet Trade  
54 & Industry Association (Zentralverband Zoologischer Fachbetriebe e.V. ZZF),  
55 approximately 520.000 pet hamsters were kept in German households in 2020. Golden  
56 Syrian hamsters comprised 43% (223.600 animals), and the Dwarf hamster species 54%  
57 (280.800 animals) (source: Zentralverband Zoologischer Fachbetriebe (ZZF) and  
58 Industrieverband Heimtierbedarf (IVH)). While Golden Syrian hamsters, Chinese hamsters  
59 (*Cricetulus griseus*), and Roborovski Dwarf hamsters (*Phodopus roborovskii*) are highly  
60 susceptible and develop clinical disease and lung pathology, both other Dwarf hamster  
61 species (Campbell's Dwarf hamster and Djungarian Dwarf hamster) only developed  
62 subclinical disease with mild tissue damage and a rapid onset of regeneration under  
63 experimental conditions (Bertzbach et al., 2021; Trimpert et al., 2020).

64 Since the onset of the pandemic, several virus variants have emerged, five of which have  
65 been classified as variants of concern (VOC) by the World Health Organization (WHO) for  
66 their enhanced transmissibility and virulence or their reduced susceptibility to immune  
67 reactions (WHO, 01.03.2022). These include variants B.1.1.7 (Alpha), B.1.351 (Beta), P.1  
68 (Gamma), B.1.617.2 (Delta) and B.1.1.529 (Omicron). Especially the rapid worldwide

69 spread of the Delta and Omicron variants have raised concern about an acceleration of the  
70 pandemic's dynamic, despite increasing proportions of fully vaccinated humans  
71 (<https://github.com/owid/covid-19-data/tree/master/public/data/vaccinations>). Therefore,  
72 the pathogenesis induced by VOCs has been addressed in a number of recent animal studies,  
73 mostly performed in Golden Syrian hamsters (Abdelnabi et al., 2022; McMahan et al., 2022;  
74 Sreelekshmy Mohandas et al., 2022; S. Mohandas et al., 2021; O'Donnell et al., 2021).  
75 While Alpha, Beta and Delta variants caused clinical manifestation and pathology similar  
76 to the ancestral virus (S. Mohandas et al., 2021; O'Donnell et al., 2021), infection with the  
77 Omicron variant caused significantly milder clinical signs and lower levels of pulmonary  
78 affection (Abdelnabi et al., 2022; McMahan et al., 2022). However, levels of viral genomic  
79 RNA, as well as subgenomic RNA (sgRNA), were distinctly higher in the nasal turbinate  
80 samples, indicating a higher transmission risk from these animals as compared to animals  
81 infected with any of the other variants (McMahan et al., 2022).

82 Very recently, two distinct zoonotic transmission events from hamsters to humans were  
83 reported from Hong Kong followed by human-to-human transmission (Yen, 2022), after the  
84 import of pet Golden Syrian hamsters from The Netherlands, causing a re-introduction of  
85 the Delta VOC into the country. Investigation of these animals revealed SARS-CoV-2 RNA  
86 in 15 out of 28 Golden Syrian hamsters, but in none of the 77 analysed Dwarf hamsters  
87 (Yen, 2022). These findings gave rise to serious concern about the SARS-CoV-2  
88 transmission risk from pet hamsters to humans in affected households (Haagmans &  
89 Koopmans, 2022; Kok et al., 2022), and more than 2.000 pet hamsters were subsequently  
90 culled in Hong Kong. This highlights the importance of an evidence-based risk assessment  
91 regarding SARS-CoV-2 transmissions from pet hamsters to humans and vice versa. To the  
92 best of our knowledge, no systematic quantitative study on the susceptibility of Golden  
93 Syrian hamsters to a SARS-CoV-2 infection has been undertaken so far. We therefore  
94 infected groups of Golden Syrian hamsters with serial SARS-CoV-2 dilutions from  $10^5$  to  
95  $10^{-4}$  TCID<sub>50</sub>, which is equivalent to 0.7 genome copy numbers per dose, as determined by  
96 reverse transcriptase quantitative real-time PCR of serial dilutions of a SARS-CoV-2 RNA  
97 standard. Animals infected with a dose of  $1 \times 10^{-3}$  TCID<sub>50</sub> shed replication competent virus,  
98 and accumulated SARS-CoV-2 infectivity in their respiratory tract until 7 days post  
99 inoculation (dpi). This study demonstrates the extremely high SARS-CoV-2 susceptibility  
100 of Golden Syrian hamsters. For drug or vaccine efficacy studies, a moderate infection dose,  
101 sufficiently high to induce reproducible viral loads and histological findings, and at the same

102 time sufficiently low to avoid a highly artificial infection should be applied, which in our  
103 experimental setup was determined as  $1 \times 10^2$  TCID<sub>50</sub>.

## 104 105 **Results**

### 106 **Pronounced weight loss and high levels of viral shedding upon orotracheal inoculation**

107 Upon orotracheal and intranasal inoculation with SARS-CoV-2 (Fig. 1A), animals started  
108 losing body weight from 2 dpi, and the mean weight loss at 7 dpi was 16% after orotracheal  
109 inoculation and 7% after intranasal inoculation (Fig. 1 B). We observed a statistically  
110 significant 5- to 10-fold increase in viral genome shedding in the nasal wash samples at 6  
111 and 9 dpi after orotracheal inoculation as compared to the intranasal inoculation (Fig. 1C).  
112 Upon necropsy at 14 dpi, viral RNA in the respiratory tract samples was not detectable at  
113 levels allowing a quantitative comparison, and no replication competent virus was detected.  
114 Based on these data, we decided to continue with the orotracheal inoculation for subsequent  
115 experiments.

### 116 117 **$1 \times 10^{-1}$ TCID<sub>50</sub> SARS-CoV-2 is sufficient to induce body weight reduction and pneumonia**

118 Animals inoculated in our first study with doses exceeding  $1 \times 10^2$  TCID<sub>50</sub> SARS-CoV-2  
119 showed a decrease in body weight from 2 dpi, while hamsters inoculated with  $1 \times 10^1$  TCID<sub>50</sub>  
120 gained weight until 5 dpi, before losing weight until the end of the experiment. Animals  
121 inoculated with  $1 \times 10^{-1}$  and  $1 \times 10^0$  TCID<sub>50</sub> as well as the uninfected controls continued to  
122 gain weight throughout the experiment. In the second study, all groups receiving  $1 \times 10^{-1}$   
123 TCID<sub>50</sub> or higher lost weight until the end of the experiment, with an onset delayed by 2-3  
124 day in animals infected with  $1 \times 10^1$  and  $1 \times 10^0$  TCID<sub>50</sub>. In a third study using dilutions to  
125  $1 \times 10^{-4}$  TCID<sub>50</sub> and continuing until 10 dpi, doses of  $10^{-1}$  TCID<sub>50</sub> or higher induced weight  
126 loss (Fig. 2). Statistical analysis revealed significant differences between the body weights  
127 determined per group at the day of the necropsy, i.e. 7 and 10 dpi (Suppl. Tab. 1).

128  
129 During autopsy performed at 7 or 10 dpi, the extent of reddish discoloration of the whole  
130 lung was recorded. We observed decreasing estimated levels of lung affection correlated  
131 with decreasing infection doses. We still noted areas of discoloration at 7 dpi in animals that  
132 had been infected with  $1 \times 10^{-3}$  TCID<sub>50</sub> (Fig.3 A). At 10 dpi, even hamsters inoculated with  
133 the lowest dose of  $1 \times 10^{-4}$  TCID<sub>50</sub> showed lung changes (Fig. 3 B).

134 Histopathology was performed on the left lung lobe of animals sacrificed at 10 dpi.  
135 Archived lungs from a high-dose infection study ( $1 \times 10^{4.5}$  TCID<sub>50</sub>) served as positive

136 controls. Pneumonia-associated consolidation was consistently found in all hamsters  
137 infected with  $1 \times 10^{-1}$  TCID<sub>50</sub> SARS-CoV-2 or higher (Fig. 3 C, D). Lungs collected at 10  
138 dpi mainly showed regenerative changes with bronchial and type-2-pneumonocyte  
139 hyperplasia and hypertrophy with formation of multinucleated, atypical cells. However, still  
140 a moderate to severe inflammatory reaction was found, with intra-alveolar, interstitial,  
141 peribronchial and perivascular inflammatory infiltrates, as well as vasculitis and/or  
142 endothelialitis. Acute necrosis of the bronchial epithelium was a rare finding (Fig. 4 A - C).  
143 Although not statistically significant, hamsters infected with  $1 \times 10^{-1}$  TCID<sub>50</sub> showed a  
144 tendency to be less severely affected (Fig. 4 E). In general, animals infected with doses of  
145  $1 \times 10^{-2}$  TCID<sub>50</sub> and lower did not develop pneumonia-associated consolidation in the lung  
146 (Fig. 4 F, G). However, focal alveolar or perivascular infiltrates or bronchial epithelial  
147 hyperplasia were found in individual animals in each group indicating prior local infection,  
148 even after infection with  $1 \times 10^{-4}$  TCID<sub>50</sub> (Fig. 4 H, I).

#### 149 **Lateral flow device Rapid Test detects infections with $1 \times 10^{-1}$ TCID<sub>50</sub> SARS-CoV-2**

150 We analysed oral swab samples collected at 6 dpi using the Nowcheck COVID-19 Rapid  
151 Test, which confirmed the infection in hamsters inoculated with doses higher than  $1 \times 10^0$   
152 TCID<sub>50</sub>, as well as in two hamsters inoculated with  $1 \times 10^{-1}$  TCID<sub>50</sub>, which translates into  
153 samples with ct-values in the real-time RT-PCR below 30. All uninfected hamsters as well  
154 as one hamster inoculated with  $1 \times 10^{-1}$  TCID<sub>50</sub> were negative at 6 dpi (Fig. S1). We also  
155 analysed nasal washes collected at 7 dpi. Again, the infection was detectable in animals  
156 challenged with doses of  $1 \times 10^{-1}$  TCID<sub>50</sub> or higher, i.e. for samples with ct-values below 30.  
157

#### 158 **$1 \times 10^{-2}$ TCID<sub>50</sub> SARS-CoV-2 is sufficient to induce seroconversion**

159 To confirm a systemic infection, all sera collected during necropsies were tested in an  
160 indirect ELISA based on the SARS-CoV-2 RBD antigen. ROC analysis was performed for  
161 the determination of the ELISA cut-off value. We determined a specificity of 100% and a  
162 sensitivity of 99.56% using the cut-off value of 14.11 percent of the positive control value  
163 (PP) (Fig. S2 A). We detected seroconversion with a dose-dependent increase of PP values  
164 in hamsters inoculated with infection doses of  $1 \times 10^{-2}$  TCID<sub>50</sub> or higher (Fig. S2 B).  
165

#### 166 **$1 \times 10^{-3}$ TCID<sub>50</sub> SARS-CoV-2 is sufficient to induce oral and nasal viral shedding**

167 From the first day post infection, animals infected with  $10^2$  TCID<sub>50</sub> SARS-CoV-2 or higher  
168 shed virus between  $10^{3.5}$  and  $10^{4.5}$  genome copy numbers /  $\mu$ l RNA. By 3 dpi, all animals  
169

170 infected with doses of  $1 \times 10^{-1}$  TCID<sub>50</sub> or higher shed virus (Fig. 5 A). The oral swab samples  
171 contained replicating virus even in the groups infected with a dose of  $10^{-1}$  TCID<sub>50</sub> until 6  
172 dpi, and at a level of  $10^2$  TCID<sub>50</sub>/ ml in the swab sample collected at 6 dpi from one animal  
173 infected with the  $1 \times 10^{-3}$  TCID<sub>50</sub> dose. This result was confirmed by the detection of SARS-  
174 CoV-2 sgRNA as an additional proof of a present or past virus replication. All positive  
175 results for the nasal wash samples collected at 2 and 4 dpi were confirmed by re-testing for  
176 sgRNA, with ct values of about 3 points above those determined for the SARS-CoV-2 N-  
177 gene (Tab. 2). The peak of oral shedding of replication competent virus was observed  
178 between 3 and 5 dpi, at levels reaching up to  $10^3$  TCID<sub>50</sub>/ ml in the oral swab samples (Fig  
179 5 B).

180 SARS-CoV-2 RNA levels detected in the nasal washes were generally 10- to 100- times  
181 higher than those determined from the oral swab samples. We were able to detect viral RNA  
182 at 2 and 4 dpi in nasal washes, even in the animals infected with the lowest dose of  $10^{-4}$   
183 TCID<sub>50</sub> (Fig. 6 A). Significant differences were determined for the copy numbers detected  
184 in the different infection groups (Tab 1). The peak of nasal shedding of replication  
185 competent virus was observed at 2 dpi at levels reaching up to  $10^7$  TCID<sub>50</sub> / ml, while  
186  $1 \times 10^{2.75}$  TCID<sub>50</sub> (equivalent to the estimated MID for humans), as well as sgRNA were  
187 detected in a sample collected from one animal infected with  $10^{-3}$  TCID<sub>50</sub> (Fig. 6 B). The  
188 dose-dependent delay in onset of oral and nasal shedding is summarized in Fig. 7.

### 190 **Replication competent virus in lungs after infection with $1 \times 10^{-1}$ TCID<sub>50</sub>, and in nasal conchae** 191 **after infection with $1 \times 10^{-3}$ TCID<sub>50</sub>**

192 Similar levels of viral RNA were detected in nasal conchae samples of all animals sacrificed  
193 at 7 dpi, independent of the inoculation dose, including the group infected with a dose of  
194  $1 \times 10^{-3}$  TCID<sub>50</sub> (Fig. 8 A), while at 10 dpi, viral RNA was only detected in the samples  
195 collected from the infection groups  $1 \times 10^2$  to  $1 \times 10^{-1}$  TCID<sub>50</sub> (Fig. 8 B). Interestingly at 7 dpi,  
196 the highest levels of viral RNA were detected in trachea and lung samples collected in  
197 groups inoculated with the lowest infection dose of  $1 \times 10^{-3}$  TCID<sub>50</sub>. At this time point, the  
198 highest virus titers were determined for the nasal conchae samples collected from animals  
199 infected with SARS-CoV-2 doses between  $10^0$  and  $10^{-3}$  TCID<sub>50</sub> (Fig. 8 C), which was  
200 confirmed by the detection of sgRNA (Tab. 2), while only nasal conchae samples from  
201 animals infected with  $10^{-1}$  TCID<sub>50</sub> contained detectable levels of replication competent virus  
202 at 10 dpi (Fig. 8 D). Statistically different levels of replication competent virus were

203 detected in lung samples collected from animals inoculated with different infection doses  
204 (Suppl. Tab. 1).

### 205 **Sequence analysis of SARS-CoV-2 retrieved from animals infected with a high or a low dose**

206 We exemplarily analysed SARS-CoV-2 whole-genome sequences retrieved from nasal  
207 conchae samples of two animals. Animal H310 (L5497) from a high-dose infection study  
208 ( $1 \times 10^{4.5}$  TCID<sub>50</sub>) autopsied at 10 dpi, whereas animal H318 (L5537) was infected with  $1 \times 10^1$   
209 TCID<sub>50</sub>. Both animals and was sacrificed at 10 dpi. The sequence of the first sample is  
210 identical to the virus stock 2019\_nCoV Muc-IMB-1 and shows only one SNV, a transition  
211 in the M gene (C26877T) with 52% variant frequency (strand bias 51%) that was already  
212 detected as minor variant with 18% variant frequency in the virus stock. The sequence of  
213 the second animal is identical to the virus stock and shows only one transition in the ORF1a,  
214 nsp6 (T11639C) and no further SNVs. Both described changes are silent mutations. The  
215 genome sequences are available under ENA study accession number PRJEB51977.  
216

### 217 **Discussion**

218 Today, Golden Syrian hamsters are the leading animal model in SARS-CoV-2 research, in  
219 particular for vaccine and drug efficacy studies (Chiba et al., 2022; Meseda et al., 2021;  
220 Taylor et al., 2021; Yadav et al.), since they mirror the moderate disease phenotype of  
221 human patients with a complete recovery within 14 days (Gruber, Firsching, Trimpert, &  
222 Dietert, 2021). When establishing this model, we initially used an infection dose of  $1 \times 10^5$   
223 TCID<sub>50</sub>, and found the orotracheal infection route to induce a more prominent weight loss  
224 and viral shedding, the latter exceeding those obtained after intranasal infection by at least  
225 a factor of 5. Therefore, this route was used for all subsequent studies. Since the intranasal  
226 route was used in almost all other published studies (Chiba et al., 2022; Meseda et al., 2021;  
227 Taylor et al., 2021; Yadav et al.), and to the best of our knowledge no report of an  
228 orotracheal SARS-CoV-2 inoculation of hamsters has been published so far, a direct  
229 comparison between previously published experiments and our study is not feasible.  
230

231 In our study, we were able to show that an infection dose of  $1 \times 10^1$  TCID<sub>50</sub> was sufficient  
232 to induce a significant weight loss, oral and nasal shedding as well as accumulation of  
233 replication competent virus in the respiratory tract, and SARS-CoV-2 related pneumonia.  
234 In this group, the onset of weight loss and lethargy were delayed by 3 days, presumably due  
235 to an initial virus replication at the inoculation site, before spreading throughout the  
236



237 respiratory tract. Infection doses of  $1 \times 10^{-2}$  TCID<sub>50</sub> or higher were sufficient to induce a  
238 dose-dependent seroconversion within 7 days, therefore the virus must have reached the  
239 lymphatic system within the first 2-3 days post infection. As no blood samples were  
240 available for time points before 7 dpi, a possible viremia within the first 3 days post infection  
241 could not be monitored. The estimated proportion of affected lung tissue also showed a clear  
242 correlation to the infection dose. Even after challenge with  $1 \times 10^{-3}$  TCID<sub>50</sub>, we observed  
243 macroscopically visible lung affections, oral and nasal shedding as well as accumulation of  
244 replication competent virus in the nasal conchae and the trachea. We therefore define the  
245 MID for Golden Syrian hamsters upon orotracheal infection as  $1 \times 10^{-3}$  TCID<sub>50</sub>. This result  
246 not only proves the exceptionally high susceptibility of Golden Syrian hamsters to a SARS-  
247 CoV-2 infection, but also indicates the low sensitivity of the Vero E6 virus titration assay  
248 with a detection limit of  $1 \times 10^{1.5}$  TCID<sub>50</sub>, as compared to  $1 \times 10^{-3}$  TCID<sub>50</sub> in the Golden Syrian  
249 hamster model. In another Golden Syrian hamster susceptibility study published by Rosenke  
250 and co-workers (Rosenke et al., 2020) using intranasal infection doses between  $1 \times 10^3$  and  
251  $1 \times 10^0$  TCID<sub>50</sub>, a dose of 5 TCID<sub>50</sub> was postulated as MID. The data obtained for the lower  
252 dose group resembles what we observed for the group inoculated with  $1 \times 10^{-2}$  TCID<sub>50</sub>, which  
253 may be due to the increased efficiency of the orotracheal route. Moreover, since data were  
254 only collected until 5 dpi, a delayed onset of virus shedding and virus propagation in the  
255 respiratory tract after challenge with very low doses would have remained unnoticed.

256 We propose an optimal SARS-CoV-2 infection dose for drug or vaccine efficacy studies in  
257 Golden Syrian hamsters of  $10^2$  TCID<sub>50</sub>, as this is sufficient to induce a reproducible (as  
258 confirmed by three independent experiments) weight loss, macroscopically visible lung  
259 affection, pneumonia, shedding of replication competent virus from 1 dpi, and the presence  
260 of high levels of replication competent virus in the respiratory tract on day 7 post infection,  
261 which will therefore allow a quantification of therapeutic effects. Infection doses of  $10^5$   
262 TCID<sub>50</sub> that are generally used in Golden Syrian hamsters (Chan et al., 2020; Dowall et al.,  
263 2021; Francis et al., 2021; Johnson et al., 2022) may be too high to allow a disease  
264 progression at least partly resembling the distinctly slower processes in humans after a  
265 natural infection (Karimzadeh et al., 2021).

266 Replication competent virus as well as SARS-CoV-2 sgRNA were detectable at dose  
267 dependent levels in nasal washes of all groups until 4 dpi except the group infected with  
268  $1 \times 10^{-4}$  TCID<sub>50</sub>. Thus, by this time, the virus must have already disseminated from the  
269 trachea and lung (inoculation site) to the upper respiratory tract, which may have occurred  
270 either via mucus transport from the lower respiratory tract, or via the bloodstream. Since we

271 did not determine seroconversion in the animals receiving an infection dose of  $1 \times 10^{-2}$   
272 TCID<sub>50</sub> or lower, virus dissemination via active mucus transport seems most plausible. The  
273 positive sgRNA results also indicate a past active viral replication in the nasal epithelium,  
274 as sgRNAs are transcribed only in infected cells (Wolfel et al., 2020). However, positive  
275 sgRNA results cannot be interpreted as an equivalent to the detection of replication  
276 competent virus by TCID<sub>50</sub> (Alexandersen, Chamings, & Bhatta, 2020).

277 To allow a first insight whether the exposition to immune reactions in an animal inoculated  
278 with a low dose may stimulate the formation of gene mutations, we analysed the SARS-  
279 CoV-2 sequences retrieved from nasal conchae samples from one animal each infected with  
280 a high dose and a low dose, and found no indication for such an effect.

281 The confirmation of SARS-CoV-2 infections in animals infected with  $1 \times 10^{-1}$  TCID<sub>50</sub> or  
282 higher by LFD confirms the suitability of these assays for the screening of hamster swab  
283 samples, which may be relevant in households with COVID-19 patients where Golden  
284 Syrian hamsters are kept as pets. Upon natural infection with a low dose, these animals will  
285 most probably not develop clinical signs, but will shed replication competent virus for at  
286 least six days at levels possibly exceeding the estimated human MID of  $1 \times 10^2$  TCID<sub>50</sub>, thus  
287 allowing a zoonotic infection cycle between humans and Syrian Gold hamsters, as it has  
288 been observed very recently in Hong Kong (Yen, 2022).

289 Our data demonstrate the exceptionally high susceptibility of Golden Syrian hamsters to an  
290 infection with a German SARS-CoV-2 isolate obtained during an outbreak in Munich in  
291 January 2020 (Wolfel et al., 2020). Other groups reported an almost identical disease  
292 progression and virus shedding pattern for VOCs Alpha, Beta, and Delta as for the ancestral  
293 virus in hamsters (S. Mohandas et al., 2021; O'Donnell et al., 2021), rendering the titration  
294 experiments with these VOCs dispensable. Meanwhile, a low pathogenicity combined with  
295 high up to 100-fold increased viral loads in the upper respiratory tract were reported for  
296 hamsters infected with the Omicron variant (Abdelnabi et al., 2022; McMahan et al., 2022).  
297 Therefore, an Omicron titration study in hamsters similar to what we describe here for the  
298 ancestral virus may be rewarding.

299 In summary, we determined the extremely high susceptibility of Golden Syrian hamsters to  
300 a SARS-CoV-2 infection, and defined the MID as  $1 \times 10^{-3}$  TCID<sub>50</sub>. A very close monitoring  
301 of pet Golden Syrian hamsters that are kept in households with COVID-19 patients is  
302 therefore strongly recommended, for instance by using rapid tests. COVID-19 patients  
303 should strictly avoid any direct or indirect contact to their pet hamsters. The optimal  
304 infection dose for drug efficacy studies was determined as  $1 \times 10^2$  TCID<sub>50</sub>. These conclusions

not only apply to Golden Syrian hamsters, but likely also to Chinese hamsters (*Cricetulus griseus*) and Roborovski Dwarf hamsters (*Phodopus roborovskii*), since these two species have been shown to also be highly susceptible (Bertzbach et al., 2021; Trimpert et al., 2020).

## Materials and Methods

### Experimental Design

This study was performed to quantify the susceptibility of Golden Syrian hamsters to an infection with SARS-CoV-2. All SARS-CoV-2 experimental studies were performed in the biosafety level 3 facilities at the Friedrich-Loeffler-Institut, Insel Riems, Germany.

### Cell line and virus

Vero E6 cells (Cell Culture Collection in Veterinary Medicine, FLI) were cultured in minimal essential medium (MEM) containing 10% fetal calf serum (FCS) at 37°C and 5% CO<sub>2</sub>. SARS-CoV-2 isolate 2019\_nCoV Muc-IMB-1 (accession number LR824570; (Wolfel et al., 2020)) was kindly provided by Bundeswehr Institute of Microbiology, Munich, Germany. Virus propagation was maintained in Vero E6 cells in DMEM supplemented with 2% FCS. Prior to inoculation into hamsters, the virus stock was sequenced by using a generic metagenomics sequencing workflow as described previously (Wylezich, Papa, Beer, & Hoper, 2018) with some modifications. For reverse-transcribing RNA into cDNA, SuperScriptIV First-Strand cDNA Synthesis System (Invitrogen, Germany) and the NEBNext Ultra II Non-Directional RNA Second Strand Synthesis Module (New England Biolabs, Germany) were used, and library quantification was done with the QIAseq Library Quant Assay Kit (Qiagen, Germany). Libraries were sequenced without applying further SARS-CoV-2 enrichment using an Ion 530 chip and chemistry for 400 base pair reads on an Ion Torrent S5XL instrument (Thermo Fisher Scientific, Germany).

### Virus titration - tissue culture infectious doses<sub>50</sub>

Samples were serially diluted in MEM containing 2% FCS and 100 Units Penicillin / 0.1 mg Streptomycin (P/S) (Millipore Sigma, Germany). Vero E6 cells were incubated with 100 µl of ten-fold dilutions of sample dilutions added in quadruplicates for 1 h at 37°C before 100 µl MEM containing 2% FCS and P/S were added per well and plates were incubated for 5 days at 37°C and 5% CO<sub>2</sub>. Supernatant was removed and cells were fixed with 4% formalin. Next, plates were stained with 1% crystal violet and titers were determined following the Spearman Kaerber method (Atkinson, 1961).

## 339 **Animal studies**

340 Male Golden Syrian hamsters (*Mesocricetus auratus*), 5-7 weeks old with a body weight of  
341 80 – 100 g, were obtained from Janvier Labs, France. Three hamsters were housed in  
342 individually ventilated cages (IVC). Animals had *ad libitum* access to food and water. The  
343 animals' well-being and body weight were checked daily. Handling and sampling were  
344 performed starting with the uninfected group and continuing from the low dose groups to  
345 the high dose groups to minimize the contamination risk.

### 346 *Inoculation routes*

347 To determine the optimal inoculation route for SARS-CoV-2, we inoculated groups of eight  
348 hamsters under isoflurane anaesthesia in parallel by the intranasal and orotracheal route with  
349 100 µl containing  $1 \times 10^5$  TCID<sub>50</sub>. For the orotracheal challenge, the inoculum was  
350 administered on the root of the tongue (Fig. 1a), ensuring aspiration of the inoculum with  
351 the following inhalation. Oral swab samples were collected in DMEM containing P/S daily,  
352 starting one day before inoculation. Nasal washes were collected under isoflurane  
353 anaesthesia at days 2, 4, 6, 9, 11 and 13 by flushing 200 µl PBS along the animal's nose. At  
354 14 dpi, hamsters were euthanized by deep isoflurane anaesthesia, cardiac exsanguination  
355 and cervical dislocation, and nasal conchae, trachea and lung samples were collected and  
356 stored at -80°C for virological analysis. Tissue samples were also stored in 4% neutral-  
357 buffered formalin for histopathological analysis. Serum was separated from the collected  
358 blood.

### 359 *Titration in hamsters*

360 To define the MID, three sets of experiments were performed, as the endpoint in the first  
361 two studies was not reached. For animal welfare reasons, we continued the dilutions in the  
362 second and third experiment, including an overlap ensuring the comparability of result.

363 First, hamsters were inoculated with a dose of  $1 \times 10^5$  TCID<sub>50</sub> SARS-CoV-2 and with serial  
364 dilutions from  $1 \times 10^3$  to  $1 \times 10^{-1}$  TCID<sub>50</sub>. Oral swab samples were collected at 1, 3, 5, and 6  
365 dpi, nasal washes were collected at 2 and 4 dpi as described above. At 7 dpi, hamsters were  
366 euthanized and sampled as described above.

367 In the second study, hamsters were inoculated with a serial dilution from  $1 \times 10^4$  to  $1 \times 10^{-3}$   
368 TCID<sub>50</sub> SARS-CoV-2. Sampling and autopsies were performed as described above.

369 In the third study, hamsters were inoculated with  $1 \times 10^2$  TCID<sub>50</sub>, and with serial dilutions  
370 from  $1 \times 10^0$  to  $1 \times 10^{-4}$  TCID<sub>50</sub> SARS-CoV-2. This experiment was conducted for 10 days to  
371 allow the follow-up of clinical and virological data after a 2 - 3 day delayed disease onset  
372 in the groups inoculated with low doses. Oral swab samples were collected at 1, 3, 5, 6, 8

373 and 9 dpi, while nasal washes were collected at 2, 4 and 7 dpi. At 10 dpi, animals were  
374 sacrificed and autopsied as described above.

### 375 *Ethical statement*

376 Ethical approval for this study was obtained from the competent authority of the Federal  
377 State of Mecklenburg-Western Pomerania, Germany upon consultation with the Ethic  
378 Committee of Mecklenburg-Western Pomerania (file number: 7221.3-1.1-049/20), on the  
379 basis of national and European legislation, namely the EU council directive 2010/63/EU.  
380 Animal studies are continuously monitored by the Animal Welfare Officer and were  
381 approved by the Institutional Animal Care and Use Committee (IACUC).

### 382 **Total RNA extraction and SARS-CoV-2 detection**

383 Total RNA was extracted from swab, nose fluid and tissue samples as described earlier  
384 (Schlottau et al., 2020). SARS-CoV-2 RNA was detected using “Envelope (E)-gene Sarbeco  
385 6-carboxyfluorescein quantitative RT-PCR” (Corman et al., 2020) as described previously  
386 (Schlottau et al., 2020). Viral genome copy numbers were calculated from standard curves  
387 determined for  $10^{-2}$  to  $10^{-5}$  dilutions containing known copy numbers of SARS-CoV-2.

388 Selected samples were analysed for the presence of subgenomic RNA (sgRNA) as an  
389 indication of virus replication, using a published protocol (Alexandersen et al., 2020;  
390 Hoffmann et al., 2021). Quantitative Realtime PCR was performed with the qScript XLT  
391 One-Step RT-qPCR ToughMix (QuantaBio/VWR). Primer sequences for the ORF 7a  
392 detection are available upon request.

### 393 **Indirect SARS-CoV-2 RBD ELISA**

394 SARS-CoV-2 specific antibodies were detected using a published protocol (Wernike et al.,  
395 2021) with the modification of using a 1:30.000 dilution of Protein A/G (Thermo Fisher) in  
396 exchange of the multi-species conjugate.

397 To determine a cut-off-value and the diagnostic sensitivity of this modified assay, we tested  
398 53 negative hamster sera and 227 sera of SARS-CoV-2 infected hamsters. The area under  
399 the receiver operating characteristic (ROC) curve was used to determine the ELISA cut-off-  
400 value. Statistical analyses were performed using MedCalc for Windows, version 19.4  
401 (MedCalc Software, Ostend, Belgium). p-value < 0.01 was regarded as statistically  
402 significant.

### 403 **Lateral flow device (LFD) Rapid Test**

404 Oral swab samples of groups inoculated with  $1 \times 10^3$  to  $1 \times 10^2$  TCID<sub>50</sub> SARS-CoV-2 were  
405 collected at 6 dpi in lysis buffer supplied with the Nowcheck COVID-19 LFD (concile  
406 GmbH, Freiburg, Germany) testkit. 120 µl of the suspension was applied on the LFD and

407 incubated at RT for 15 min. We also analysed nasal wash samples collected at 7 dpi by  
408 diluting 25 µl of the fluid into 300 µl of the supplied lysis buffer and applying 120 µl of this  
409 mixture to the LFD. Evaluation of the control (C) and test (T) bands was performed  
410 according to the instructions. LFDs were imaged and densitometry was performed on the C  
411 and T bands using ImageJ (ImageJ 1.52a, Wayne Rasband, NIH, USA). These band  
412 quantifications were used to calculate a T/C ratio. Standard deviation was calculated from  
413 the T/C ratios within each respective group.

#### 414 **Pathology of lung samples collected at 10 dpi**

415 During autopsy, the percentage of dark red discoloration per total lung tissue was estimated.  
416 The left lung lobe was carefully removed, immersion-fixed in 10% neutral-buffered  
417 formalin, paraffin-embedded, and 2-3-µm sections were stained with hematoxylin and eosin  
418 (HE). Slides were scanned using a Hamamatsu S60 scanner, and evaluated using the  
419 NDPview.2 plus software (Version 2.8.24, Hamamatsu Photonics, K.K. Japan). The lung  
420 tissue was evaluated using a 500x500µm grid, and the extent of pneumonia-associated  
421 consolidation was recorded as percentage of affected lung fields. Further, the lung was  
422 examined for the presence of SARS-CoV2-characteristic lesions described for hamsters, i.e.  
423 intra-alveolar, interstitial, peribronchial and perivascular inflammatory infiltrates, alveolar  
424 edema, necrosis of the bronchial and alveolar epithelium, diffuse alveolar damage, vasculitis  
425 or endothelialitis, pneumocyte type 2 hyperplasia/hypertrophy with bronchialisation and  
426 atypical cells, and hypertrophy/hyperplasia of the bronchial epithelium. Archived lung  
427 tissues from hamsters infected with  $1 \times 10^{4.5}$  TCID<sub>50</sub> were included as positive controls.  
428 Evaluation and interpretation were performed by a board-certified pathologist (DipLECVP)  
429 following a post examination masking approach (Meyerholz & Beck, 2018).

#### 430 **Sequence analysis**

431 Full genome sequences were generated via reference mapping with the Genome Sequencer  
432 software suite (version 2.6; Roche; default software settings for quality filtering and  
433 mapping), using SARS-CoV-2 strain 2019\_nCoV\_Muc\_IMB1 (accession number  
434 LR824570) as reference. Consensus sequences and underlying sequence reads were  
435 visualized using Geneious Prime (10.2.3; Biomatters, Auckland, New Zealand). The  
436 presence of single nucleotide variants (SNVs) was checked using the variant analysis tool  
437 implemented in Geneious Prime (default settings, minimum variant frequency 0.02).

#### 438 **Statistical analysis**

439 Mean values determined for the experimental groups were compared using analysis of  
440 variance (ANOVA) with Tukey's post-hoc tests for multiple comparisons and non-

441 parametric Kruskal-Wallis test followed by the Dunn's method for multiple comparisons.  
442 Data were analyzed using GraphPad Prism (version 9; GraphPad Software, Inc., CA, USA)  
443 and SPSS software (IBM Corp. Released 2011. IBM SPSS Statistics for Windows, Version  
444 20.0, IBM Corporation, Armonk, NY, USA). *P*-value < 0.05 was considered statistically  
445 significant.

446 For histopathology, data were tested for Gaussian distribution using the Shapiro-Wilk test,  
447 followed by one-way ANOVA with Tukey's post-hoc tests for multiple comparison.  
448  
449

## 450 **Acknowledgments**

451 Daniel Balkema, Weda Hoffmann, Julia Neumeister, Silvia Schuparis, Emilie Stutz and  
452 Patrick Zitzow are thanked for their excellent technical assistance. Doreen Fiedler, Steffen  
453 Kiepert, Frank Klipp, Christian Lipinski and Harald Manthei are thanked for their support  
454 in the animal experiments.  
455

## 456 **Funding:**

457 Max-Planck-Gesellschaft and Max-Planck-Förderstiftung  
458 FLI-internal funds

459 The funders had no role in study design, data collection and analysis, decision to publish  
460 or preparation of the manuscript.  
461

462 **Author contributions:** Conceptualization: ABB, CB; Methodology: ABB, CB, MK;  
463 Formal Analysis: CB, BM, BS, AB; Investigation: ABB, CB, BM, AB, SW, CW;  
464 Visualization: CB, BM, AB; Supervision: ABB, DH; Writing—original draft: ABB, CB,  
465 BM; Writing—review & editing: TCM, MHG, DH, DG; Resources, DG, MHG, TCM  
466 All authors have read and agreed to the published version of the manuscript.  
467

## 468 **Competing interests:**

469 The authors declare they have no competing interests.  
470

## 471 **Data and materials availability:**

472 All data needed to evaluate the conclusions in the paper are present in the paper and/or the  
473 Supplementary Materials.  
474

## Figures and Tables

### Figure 1: Orotacheal SARS-CoV-2 inoculation results in increased weight loss and viral shedding. (A)

Inoculation technique. Anaesthetized animals are fixed with a stretched neck and extended tongue, inoculum is instilled on the root of the tongue. (B) Body weight curves of uninfected control group (grey), groups infected by the orotracheal (red) and nasal routes (green);  $N = 19$ . (C) Oral and nasal shedding between 1 and 13 dpi after orotracheal (red) and intranasal (green) inoculation;  $N = 16$ .

**Figure 2: Mean and standard deviation of body weight per infection dose group.** Changes in body weight (%) in relation to 0 dpi. Statistically significant differences in daily body weight changes are marked by an asterisk.  $N = 69$ ,  $P = 0.0001$  for all days. Further details on statistical analysis are shown in Suppl. Tab. 1.

**Figure 3: Levels of lung affection after challenge with different infection doses.** (A) macroscopically assessed level of affection of whole lung (%) during autopsy at 7 dpi and (B) at 10 dpi displayed as the mean value and standard deviation for each group. (C-D) Histopathology of hamster lungs, 10 days after orotracheal SARS-CoV-2 infection. Pneumonia-associated consolidation (C) and representative overviews (D) of the entire left lung lobe of (i) uninfected control; (ii) high dose control; (iii) infected with  $1 \times 10^2$  TCID<sub>50</sub>; (iv) infected with  $1 \times 10^0$  TCID<sub>50</sub>; (v) infected with  $1 \times 10^{-1}$  TCID<sub>50</sub>; (vi) infected with  $1 \times 10^{-2}$  TCID<sub>50</sub>; (vii) infected with  $1 \times 10^{-3}$  TCID<sub>50</sub>; (viii) infected with  $1 \times 10^{-4}$  TCID<sub>50</sub>. (B-D)  $n = 3$ .

### Figure 4: Detailed histopathology of hamster lungs, 10 days after orotracheal SARS-CoV-2 infection.

Hematoxylin and eosin staining, bar 50  $\mu\text{m}$ . (i) Uninfected control, no lung lesion, (ii) after  $1 \times 10^{4.5}$  TCID<sub>50</sub> infection, showing vasculitis (arrow), type 2 pneumocyte hyperplasia and bronchialisation of alveoli (arrowhead), intra-alveolar erythrocytes (asterisk), (iii) after  $1 \times 10^2$  TCID<sub>50</sub> infection, with vasculitis (arrow), type 2 pneumocyte hyperplasia and bronchialisation of alveoli (arrowhead) and perivascular infiltrates (asterisk), (iv) after  $1 \times 10^0$  TCID<sub>50</sub> infection exhibiting perivascular (arrow) and alveolar (asterisk) infiltrates, type 2 pneumocyte hyperplasia and bronchialisation of alveoli (arrowhead), (v) after  $1 \times 10^{-1}$  TCID<sub>50</sub> infection, showing alveolar infiltrates (asterisk), type 2 pneumocyte hyperplasia and bronchialisation of alveoli (arrowhead), (vi) after  $1 \times 10^{-2}$  TCID<sub>50</sub> infection, with focal alveolar infiltrates (arrow) and edema (asterisk), (vii) after  $1 \times 10^{-3}$  TCID<sub>50</sub> infection, exhibiting focal hypertrophy/hyperplasia of bronchial epithelium (arrow), (viii) after  $1 \times 10^{-4}$  TCID<sub>50</sub>, with focal alveolar infiltrates (arrow), (ix) after  $1 \times 10^{-4}$  TCID<sub>50</sub> showing focal perivascular infiltrates (arrow).

**Figure 5: Viral shedding in oral swab samples.** (A) Genome copy number ( $\text{Log}_{10}$ ) of viral RNA and (B) replication competent virus ( $\text{Log}_{10}$  TCID<sub>50</sub>/ml) detected in the oral swab samples of all hamsters. All groups were analysed, negative results are not shown. p-values are indicated for statistically significant differences in RNA levels. Details on statistical analysis are shown in Suppl. Tab. 1. Colors match and represent results from the same hamsters as shown before and following.

**Figure 6: Viral shedding in nasal washes.** (A) Genome copy number ( $\text{Log}_{10}$ ) of SARS-CoV-2 RNA and (B) replication competent virus ( $\text{Log}_{10}$  TCID<sub>50</sub>/ml) detected in the nasal wash samples of all hamsters. All groups were analysed, negative results are not shown. Details on statistical analysis are shown in Suppl. Tab. 1. Colors match and represent results from the same hamsters as shown before and following.

**Figure 7: Time-dependent shedding of replication competent virus and change in body weight after infection with decreasing SARS-CoV-2 doses.** Body weight development is shown by arrows;  $\uparrow$  increasing from 1-7 or 10 dpi;  $\downarrow$  decreasing from 1 – 7 or 10 dpi;  $\downarrow\uparrow$  decrease until 7 dpi followed by increase;  $\uparrow\downarrow$  increase until 4 dpi, followed by decrease until 10 dpi. Colors match and represent results from the same hamsters as shown before and following.



515 **Figure 8: Genome copy number (Log<sub>10</sub>) of SARS-CoV-2 RNA and replication competent virus (Log<sub>10</sub>**  
516 **TCID<sub>50</sub>/ml) detected in the respiratory tract.** (A) Genome copy number (Log<sub>10</sub>) of viral RNA and (B) replication  
517 competent virus (Log<sub>10</sub> TCID<sub>50</sub>/ml) detected in the respiratory tract samples at 7 dpi. (C) Genome copy number (Log<sub>10</sub>)  
518 of viral RNA and (D) replication competent virus (Log<sub>10</sub> TCID<sub>50</sub>/ml) detected in the respiratory tract samples at 10 dpi.  
519 Statistically significant differences in RNA levels were determined at 7 dpi. Further details on statistical analysis are  
520 shown in Suppl. Tab. 1 and Suppl. Tab. 3. Colors match and represent results from the same hamsters as shown before.

521

522

523

524

525

526

527

528

529

530

531 **References:**

- 532 Abdelnabi, R., Foo, C. S., Zhang, X., Lemmens, V., Maes, P., Slechten, B., . . . Neyts, J. (2022).  
533 The omicron (B.1.1.529) SARS-CoV-2 variant of concern does not readily infect Syrian  
534 hamsters. *Antiviral Res*, 198, 105253. doi:10.1016/j.antiviral.2022.105253
- 535 Alexandersen, S., Chamings, A., & Bhatta, T. R. (2020). SARS-CoV-2 genomic and subgenomic  
536 RNAs in diagnostic samples are not an indicator of active replication. *Nat Commun*, 11(1),  
537 6059. doi:10.1038/s41467-020-19883-7
- 538 Atkinson, G. F. (1961). *The Spearman-Kärber Method of Estimating 50% Endpoints*. Retrieved  
539 from <https://hdl.handle.net/1813/32006>
- 540 Basu, S. (2021). Computational characterization of inhaled droplet transport to the nasopharynx.  
541 *Sci Rep*, 11(1), 6652. doi:10.1038/s41598-021-85765-7
- 542 Bertzbach, L. D., Vladimirova, D., Dietert, K., Abdelgawad, A., Gruber, A. D., Osterrieder, N., &  
543 Trimpert, J. (2021). SARS-CoV-2 infection of Chinese hamsters (*Cricetus griseus*)  
544 reproduces COVID-19 pneumonia in a well-established small animal model.  
545 *Transboundary and Emerging Diseases*, 68(3), 1075-1079.  
546 doi:<https://doi.org/10.1111/tbed.13837>
- 547 Chan, J. F., Zhang, A. J., Yuan, S., Poon, V. K., Chan, C. C., Lee, A. C., . . . Yuen, K. Y. (2020).  
548 Simulation of the Clinical and Pathological Manifestations of Coronavirus Disease 2019  
549 (COVID-19) in a Golden Syrian Hamster Model: Implications for Disease Pathogenesis and  
550 Transmissibility. *Clin Infect Dis*, 71(9), 2428-2446. doi:10.1093/cid/ciaa325
- 551 Cheng, C., Zhang, D., Dang, D., Geng, J., Zhu, P., Yuan, M., . . . Duan, G. (2021). The incubation  
552 period of COVID-19: a global meta-analysis of 53 studies and a Chinese observation study  
553 of 11 545 patients. *Infect Dis Poverty*, 10(1), 119. doi:10.1186/s40249-021-00901-9
- 554 Chiba, S., Kiso, M., Nakajima, N., Iida, S., Maemura, T., Kuroda, M., . . . Kawaoka, Y. (2022). Co-  
555 administration of Favipiravir and the Remdesivir Metabolite GS-441524 Effectively  
556 Reduces SARS-CoV-2 Replication in the Lungs of the Syrian Hamster Model. *mBio*,  
557 e0304421. doi:10.1128/mbio.03044-21
- 558 Corman, V. M., Landt, O., Kaiser, M., Molenkamp, R., Meijer, A., Chu, D. K., . . . Drosten, C.  
559 (2020). Detection of 2019 novel coronavirus (2019-nCoV) by real-time RT-PCR. *Euro*  
560 *Surveill*, 25(3). doi:10.2807/1560-7917.ES.2020.25.3.2000045
- 561 Dowall, S., Salguero, F. J., Wiblin, N., Fotheringham, S., Hatch, G., Parks, S., . . . Hewson, R.  
562 (2021). Development of a Hamster Natural Transmission Model of SARS-CoV-2 Infection.  
563 *Viruses*, 13(11), 2251. Retrieved from <https://www.mdpi.com/1999-4915/13/11/2251>
- 564 Elias, C., Sekri, A., Leblanc, P., Cucherat, M., & Vanhems, P. (2021). The incubation period of  
565 COVID-19: A meta-analysis. *Int J Infect Dis*, 104, 708-710. doi:10.1016/j.ijid.2021.01.069
- 566 Francis, M. E., Goncin, U., Kroeker, A., Swan, C., Ralph, R., Lu, Y., . . . Kelvin, A. A. (2021).  
567 SARS-CoV-2 infection in the Syrian hamster model causes inflammation as well as type I  
568 interferon dysregulation in both respiratory and non-respiratory tissues including the heart  
569 and kidney. *PLoS Pathog*, 17(7), e1009705. doi:10.1371/journal.ppat.1009705
- 570 Gruber, A. D., Firsching, T. C., Trimpert, J., & Dietert, K. (2021). Hamster models of COVID-19  
571 pneumonia reviewed: How human can they be? *Vet Pathol*, 3009858211057197.  
572 doi:10.1177/03009858211057197
- 573 Haagmans, B. L., & Koopmans, M. P. G. (2022). Spreading of SARS-CoV-2 from hamsters to  
574 humans. *Lancet*, 399(10329), 1027-1028. doi:10.1016/S0140-6736(22)00423-8
- 575 Hoffmann, D., Corleis, B., Rauch, S., Roth, N., Muhe, J., Halwe, N. J., . . . Beer, M. (2021).  
576 CVnCoV and CV2CoV protect human ACE2 transgenic mice from ancestral B BavPat1  
577 and emerging B.1.351 SARS-CoV-2. *Nat Commun*, 12(1), 4048. doi:10.1038/s41467-021-  
578 24339-7
- 579 Johnson, S., Martinez, C. I., Tedjakusuma, S. N., Peinovich, N., Dora, E. G., Birch, S. M., . . .  
580 Tucker, S. N. (2022). Oral Vaccination Protects Against Severe Acute Respiratory

- 581 Syndrome Coronavirus 2 in a Syrian Hamster Challenge Model. *J Infect Dis*, 225(1), 34-  
582 41. doi:10.1093/infdis/jiab561
- 583 Karimzadeh, S., Bhopal, R., & Nguyen Tien, H. (2021). Review of infective dose, routes of  
584 transmission and outcome of COVID-19 caused by the SARS-CoV-2: comparison with  
585 other respiratory viruses- CORRIGENDUM. *Epidemiol Infect*, 149, e116.  
586 doi:10.1017/S0950268821001084
- 587 Kok, K. H., Wong, S. C., Chan, W. M., Wen, L., Chu, A. W., Ip, J. D., . . . Yuen, K. Y. (2022). Co-  
588 circulation of two SARS-CoV-2 variant strains within imported pet hamsters in Hong Kong.  
589 *Emerg Microbes Infect*, 11(1), 689-698. doi:10.1080/22221751.2022.2040922
- 590 McMahan, K., Giffin, V., Tostanoski, L. H., Chung, B., Siamatu, M., Suthar, M. S., . . . Barouch,  
591 D. H. (2022). Reduced Pathogenicity of the SARS-CoV-2 Omicron Variant in Hamsters.  
592 *bioRxiv*, 2022.2001.2002.474743. doi:10.1101/2022.01.02.474743
- 593 Meseda, C. A., Stauff, C. B., Selvaraj, P., Lien, C. Z., Pedro, C., Nunez, I. A., . . . Weir, J. P. (2021).  
594 MVA vector expression of SARS-CoV-2 spike protein and protection of adult Syrian  
595 hamsters against SARS-CoV-2 challenge. *NPJ Vaccines*, 6(1), 145. doi:10.1038/s41541-  
596 021-00410-8
- 597 Meyerholz, D. K., & Beck, A. P. (2018). Principles and approaches for reproducible scoring of  
598 tissue stains in research. *Lab Invest*, 98(7), 844-855. doi:10.1038/s41374-018-0057-0
- 599 Mohandas, S., Yadav, P. D., Sapkal, G., Shete, A. M., Deshpande, G., Nyayanit, D. A., . . . Jain, R.  
600 (2022). Pathogenicity of SARS-CoV-2 Omicron in Syrian hamsters and its neutralization  
601 with different Variants of Concern. *bioRxiv*, 2022.2001.2019.477013.  
602 doi:10.1101/2022.01.19.477013
- 603 Mohandas, S., Yadav, P. D., Shete, A., Nyayanit, D., Sapkal, G., Lole, K., & Gupta, N. (2021).  
604 SARS-CoV-2 Delta Variant Pathogenesis and Host Response in Syrian Hamsters. *Viruses*,  
605 13(9). doi:10.3390/v13091773
- 606 O'Donnell, K. L., Pinski, A. N., Clancy, C. S., Gouridine, T., Shifflett, K., Fletcher, P., . . . Marzi,  
607 A. (2021). Pathogenic and transcriptomic differences of emerging SARS-CoV-2 variants in  
608 the Syrian golden hamster model. *EBioMedicine*, 73, 103675.  
609 doi:10.1016/j.ebiom.2021.103675
- 610 Rosenke, K., Meade-White, K., Letko, M., Clancy, C., Hansen, F., Liu, Y., . . . Feldmann, H. (2020).  
611 Defining the Syrian hamster as a highly susceptible preclinical model for SARS-CoV-2  
612 infection. *bioRxiv*. doi:10.1101/2020.09.25.314070
- 613 Schlottau, K., Rissmann, M., Graaf, A., Schon, J., Sehl, J., Wylezich, C., . . . Beer, M. (2020).  
614 SARS-CoV-2 in fruit bats, ferrets, pigs, and chickens: an experimental transmission study.  
615 *Lancet Microbe*, 1(5), e218-e225. doi:10.1016/S2666-5247(20)30089-6
- 616 Sia, S. F., Yan, L.-M., Chin, A. W. H., Fung, K., Choy, K.-T., Wong, A. Y. L., . . . Yen, H.-L.  
617 (2020). Pathogenesis and transmission of SARS-CoV-2 in golden hamsters. *Nature*,  
618 583(7818), 834-838. doi:10.1038/s41586-020-2342-5
- 619 Taylor, R., Bowen, R., Demarest, J. F., DeSpirito, M., Hartwig, A., Bielefeldt-Ohmann, H., . . .  
620 Babu, Y. S. (2021). Activity of Galidesivir in a Hamster Model of SARS-CoV-2. *Viruses*,  
621 14(1). doi:10.3390/v14010008
- 622 Trimpert, J., Vladimirova, D., Dietert, K., Abdelgawad, A., Kunec, D., Dökel, S., . . . Osterrieder,  
623 N. (2020). The Roborovski Dwarf Hamster Is A Highly Susceptible Model for a Rapid and  
624 Fatal Course of SARS-CoV-2 Infection. *Cell Reports*, 33(10), 108488.  
625 doi:<https://doi.org/10.1016/j.celrep.2020.108488>
- 626 Wernike, K., Aebischer, A., Michelitsch, A., Hoffmann, D., Freuling, C., Balkema-Buschmann, A.,  
627 . . . Beer, M. (2021). Multi-species ELISA for the detection of antibodies against SARS-  
628 CoV-2 in animals. *Transbound Emerg Dis*, 68(4), 1779-1785. doi:10.1111/tbed.13926

- 629 Wolfel, R., Corman, V. M., Guggemos, W., Seilmaier, M., Zange, S., Muller, M. A., . . . Wendtner,  
630 C. (2020). Virological assessment of hospitalized patients with COVID-2019. *Nature*,  
631 *581*(7809), 465-469. doi:10.1038/s41586-020-2196-x
- 632 Wylezich, C., Papa, A., Beer, M., & Hoper, D. (2018). A Versatile Sample Processing Workflow  
633 for Metagenomic Pathogen Detection. *Sci Rep*, *8*(1), 13108. doi:10.1038/s41598-018-  
634 31496-1
- 635 Yadav, P. A.-O., Mendiratta, S. K., Mohandas, S., Singh, A. K., Abraham, P., Shete, A., . . . Jain,  
636 M. ZRC3308 Monoclonal Antibody Cocktail Shows Protective Efficacy in Syrian Hamsters  
637 against SARS-CoV-2 Infection. LID - 10.3390/v13122424 [doi] LID - 2424. (1999-4915  
638 (Electronic)).
- 639 Yen, H.-L. a. S., Thomas HC and Brackman, Christopher J. and Chuk, Shirley SY and Cheng,  
640 Samuel M.S. and Gu, Haogao and Chang, Lydia DJ and Krishnan, Pavithra and Ng, Daisy  
641 YM and Liu, Gigi YZ and Hui, Mani MY and Ho, Sin Ying and Tam, Karina WS and Law,  
642 Pierra YT and Su, Wen and Sia, Sin Fun and Choy, Ka-Tim and Cheuk, Sammi SY and  
643 Lau, Sylvia PN and Tang, Amy WY and Koo, Joe CT and Yung, Louise and Leung, Gabriel  
644 and Peiris, J.S. Malik and Poon, Leo LM. (2022). Transmission of SARS-CoV-2 (Variant  
645 Delta) from Pet Hamsters to Humans and Onward Human Propagation of the Adapted  
646 Strain: A Case Study. *The Lancet*, [Preprint]. doi:<http://dx.doi.org/10.2139/ssrn.4017393>.

Figure 1

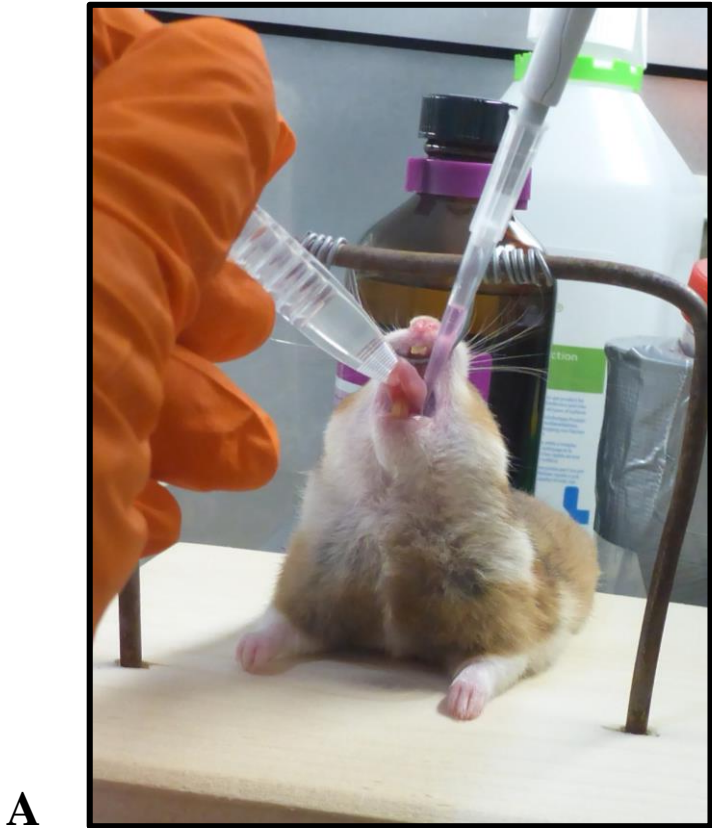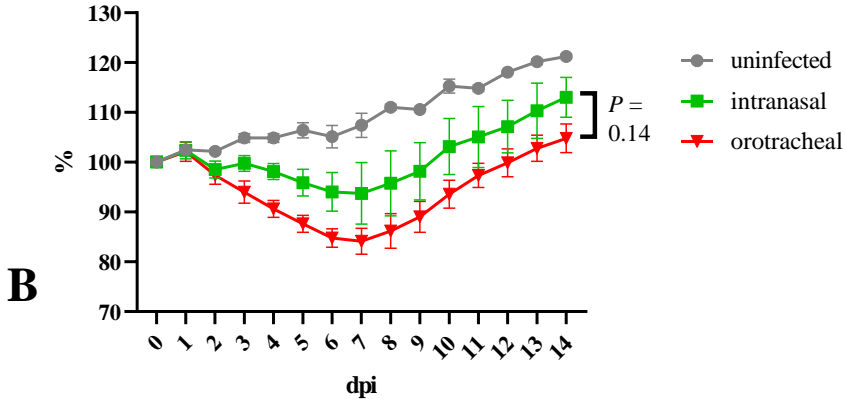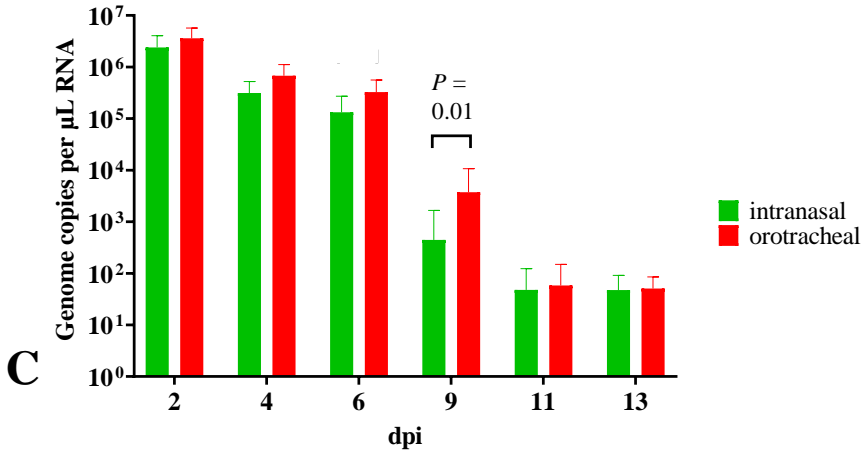

Figure 2

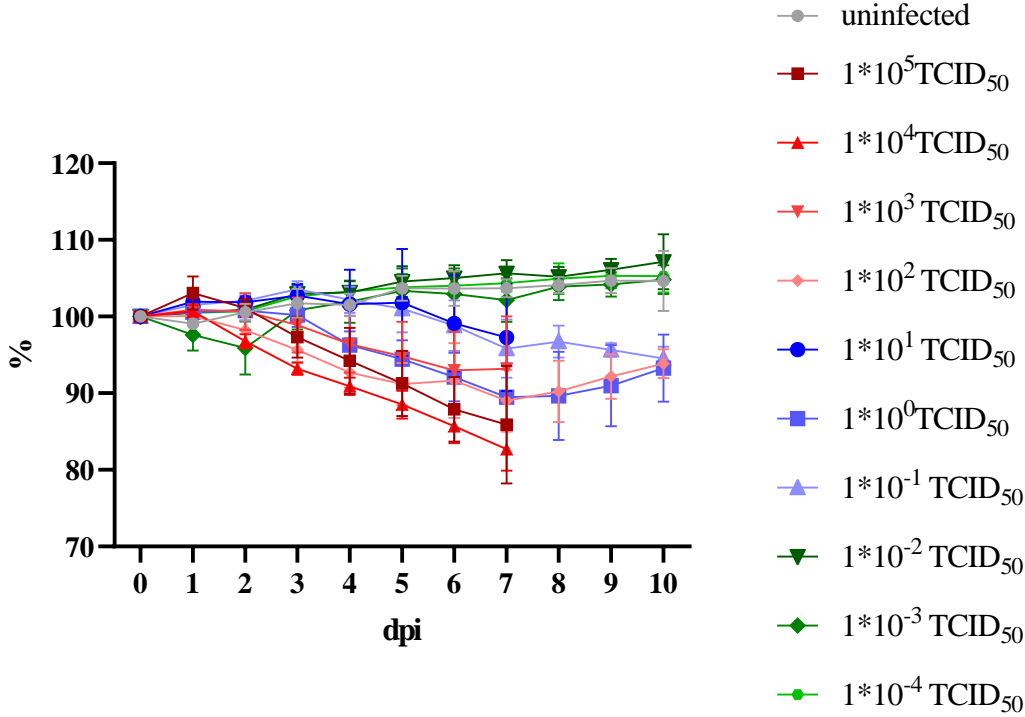

Figure 3 A + B

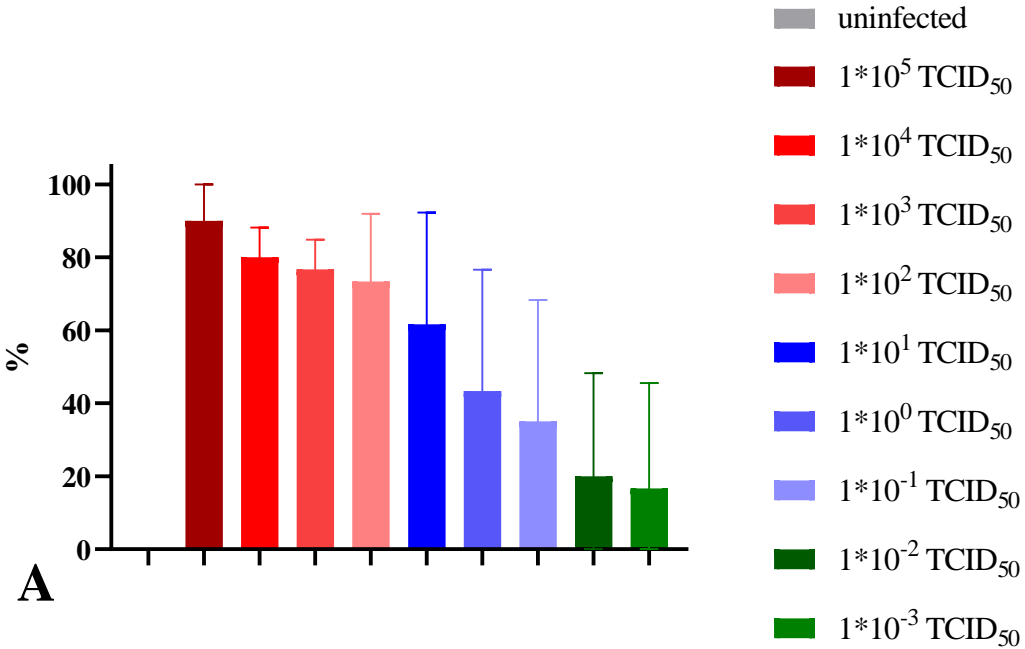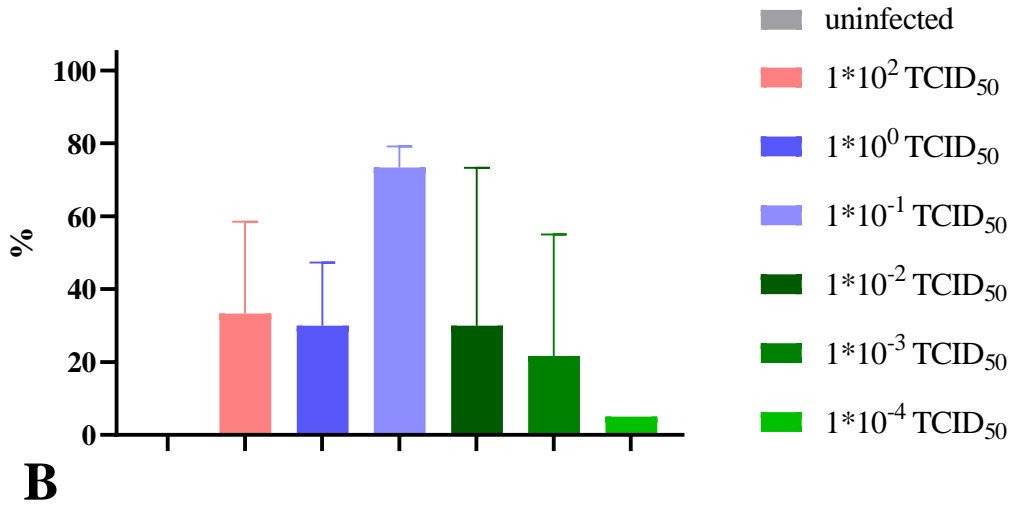

Figure 3 C + D

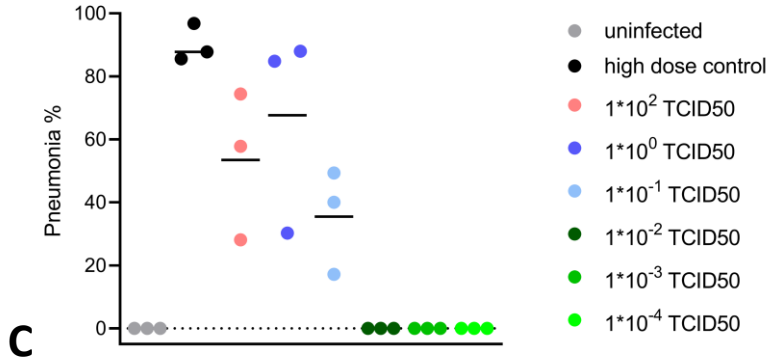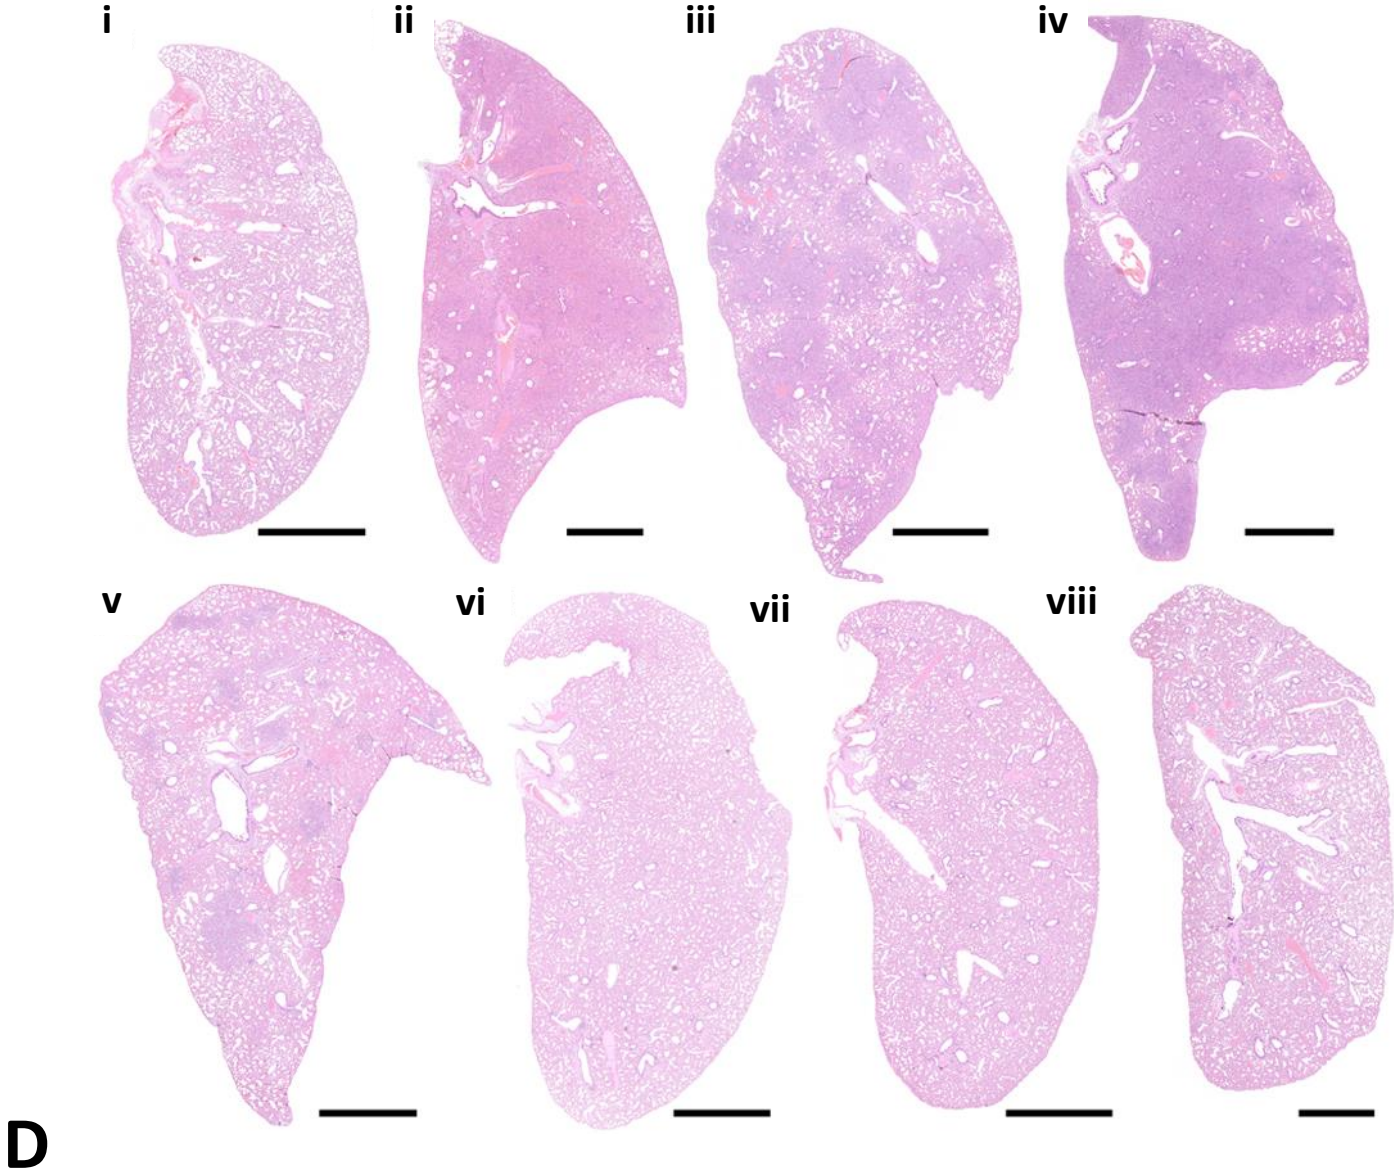



Figure 4

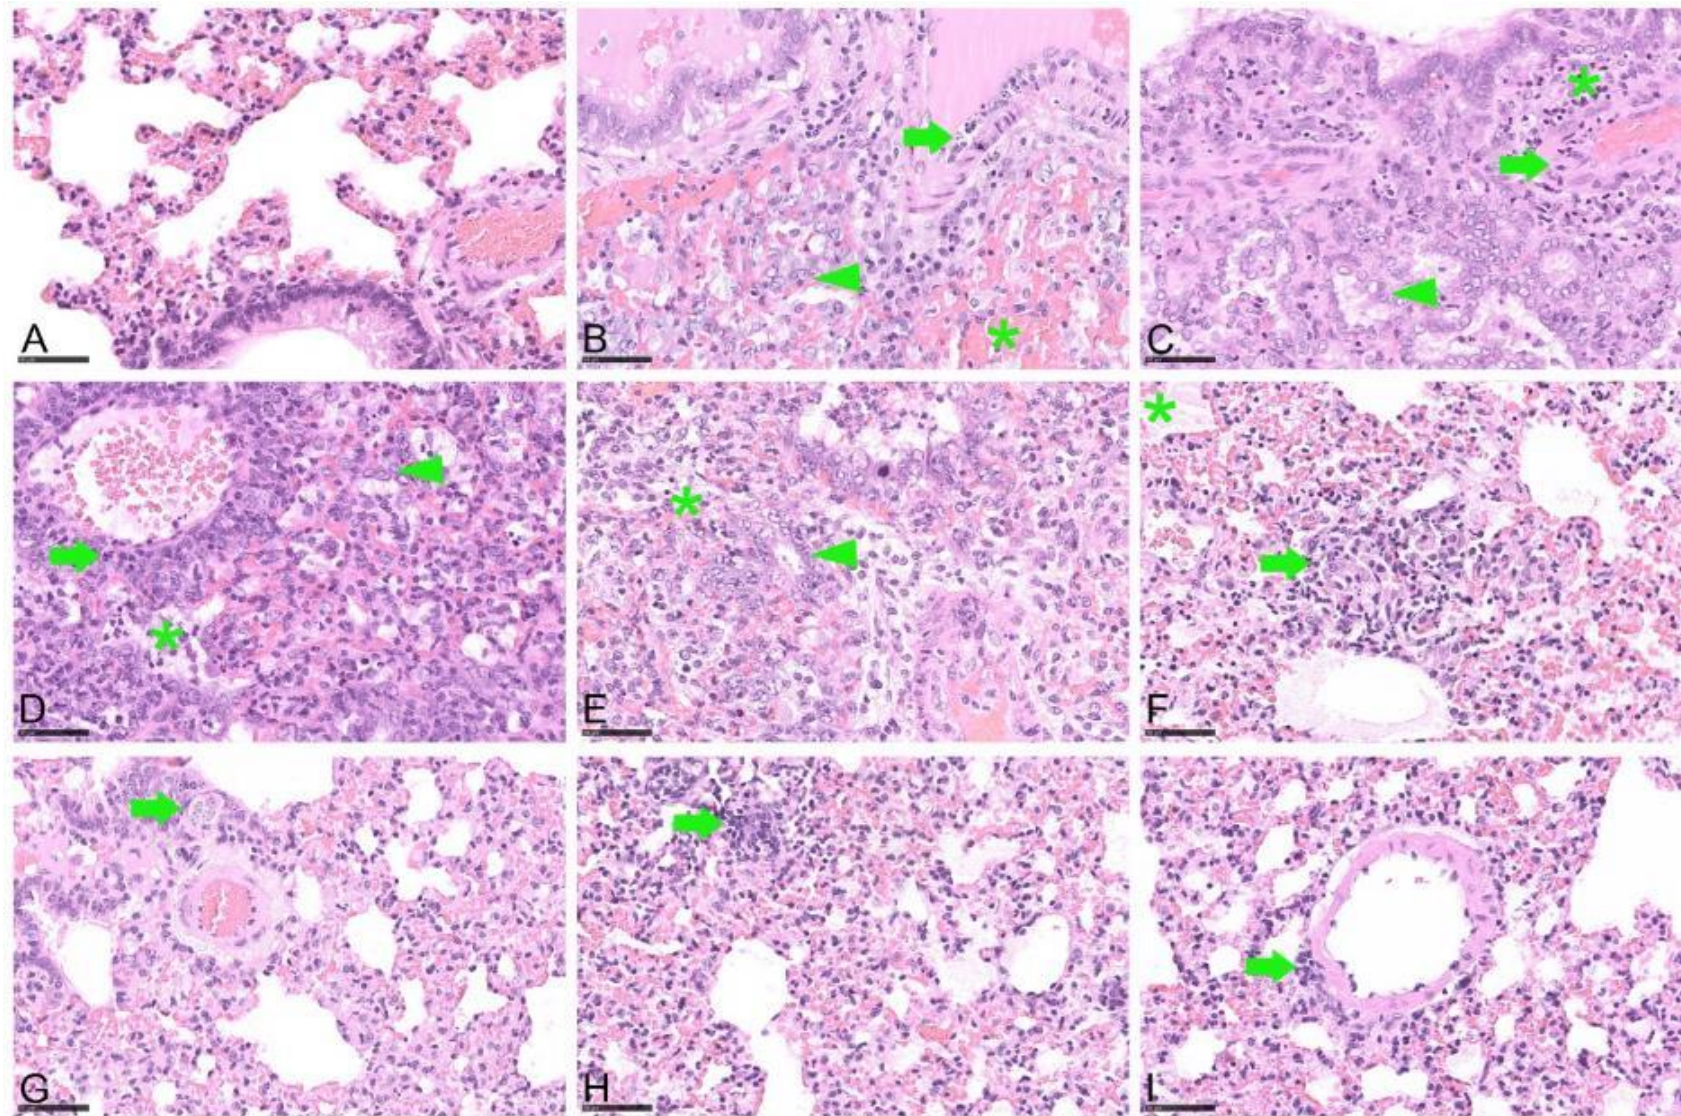

Figure 5

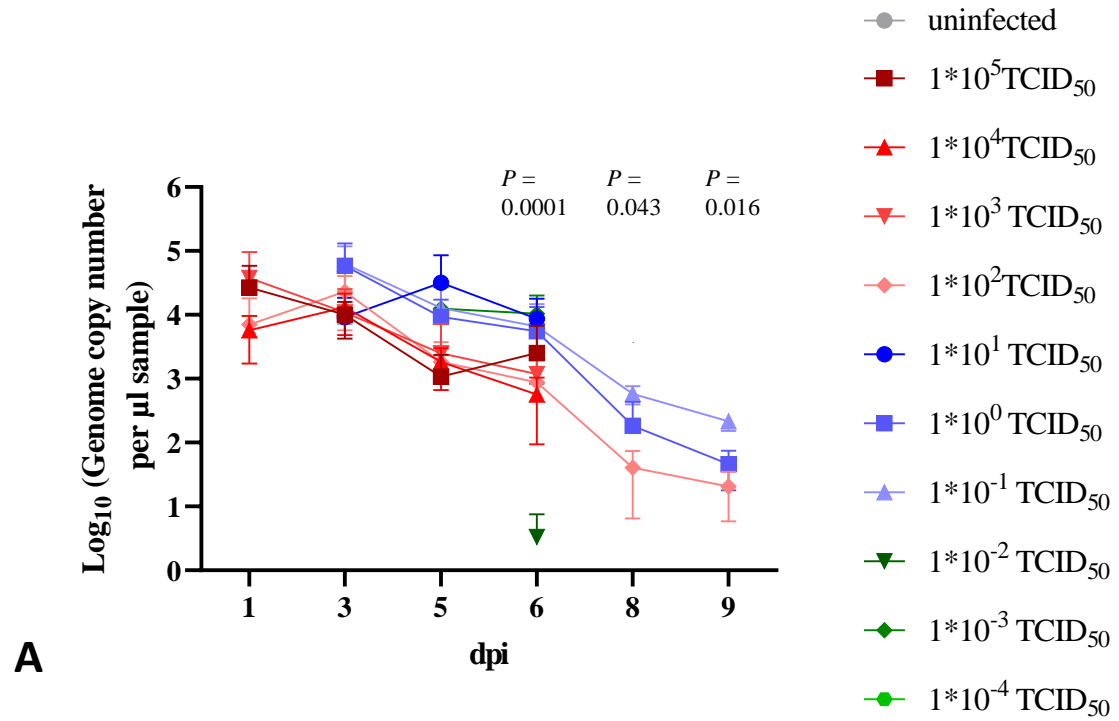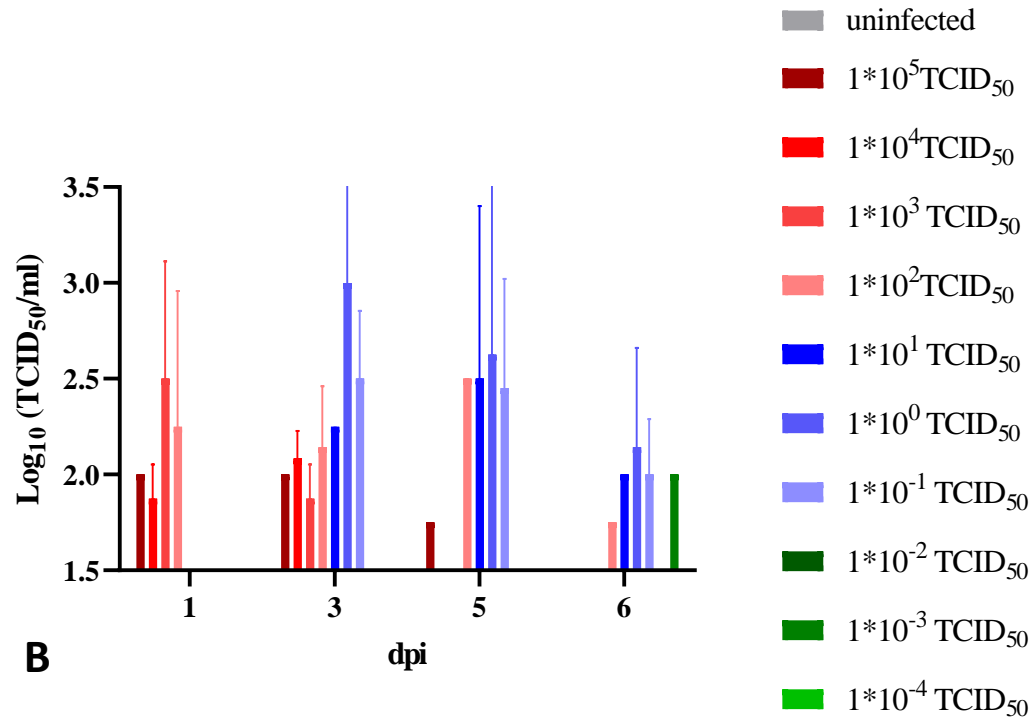

Figure 6

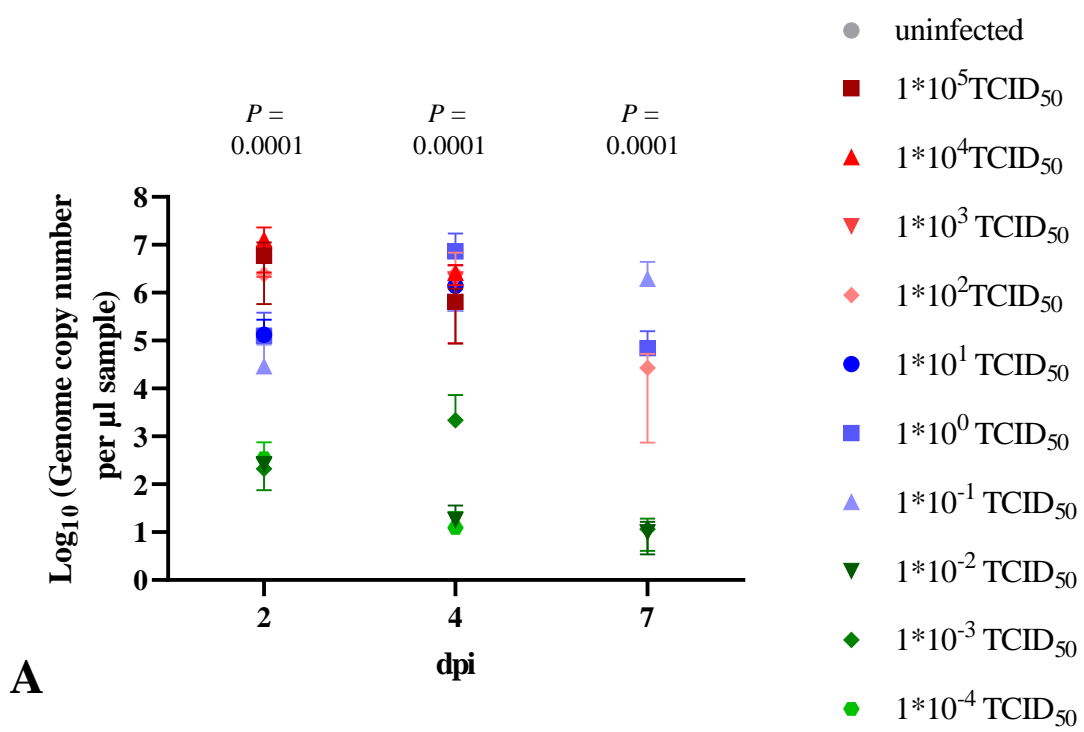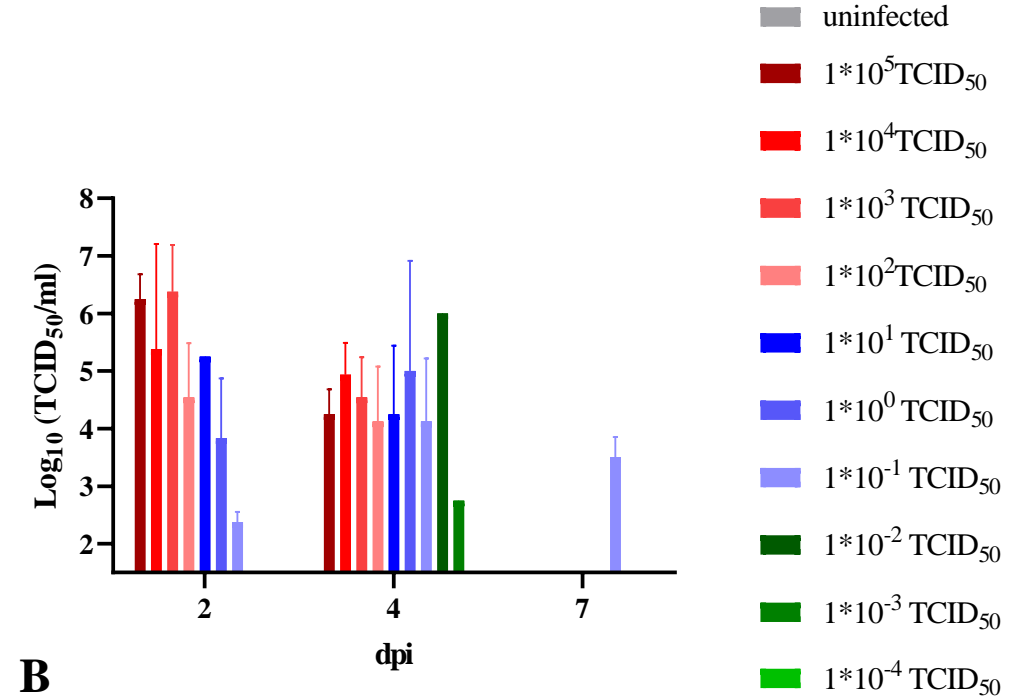

Figure 7

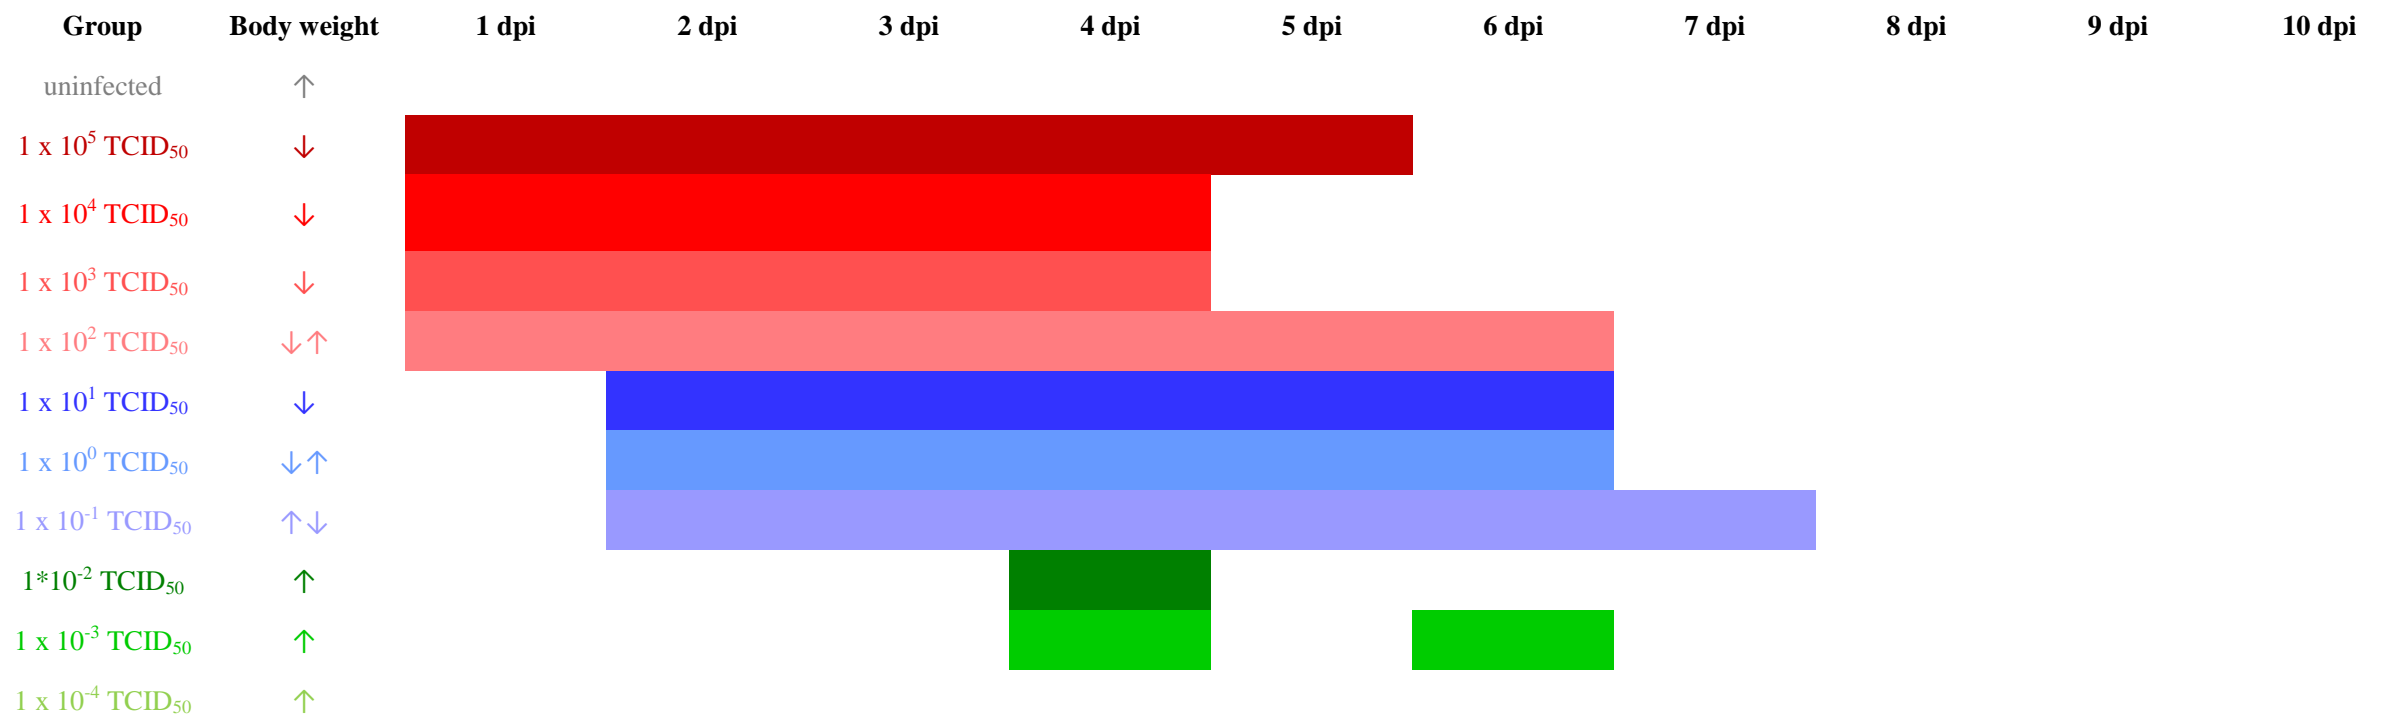

Figure 8

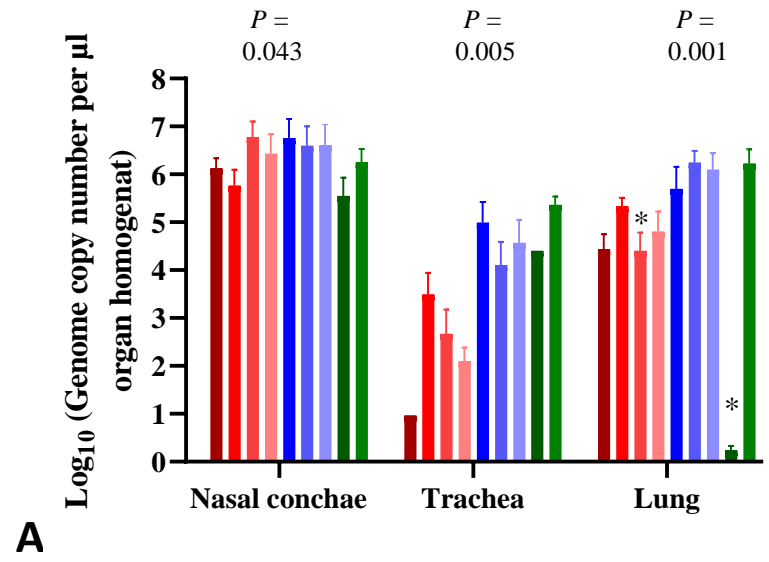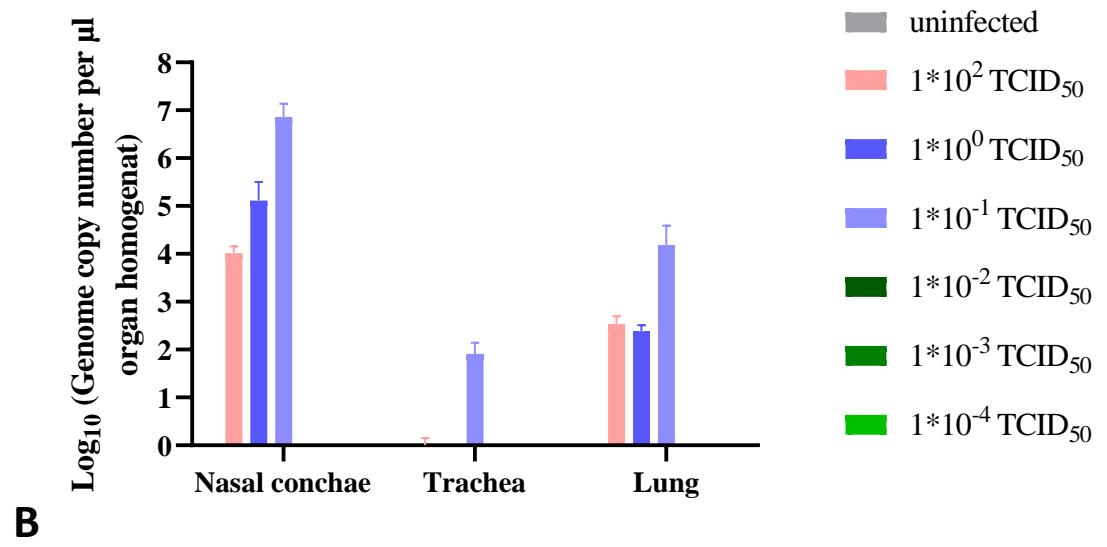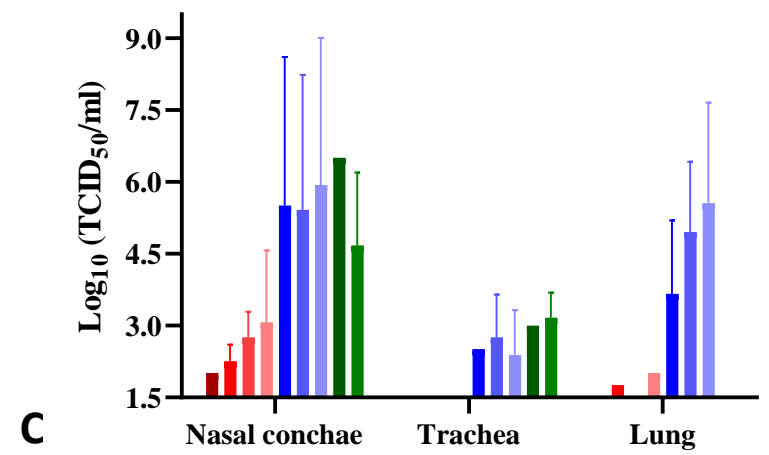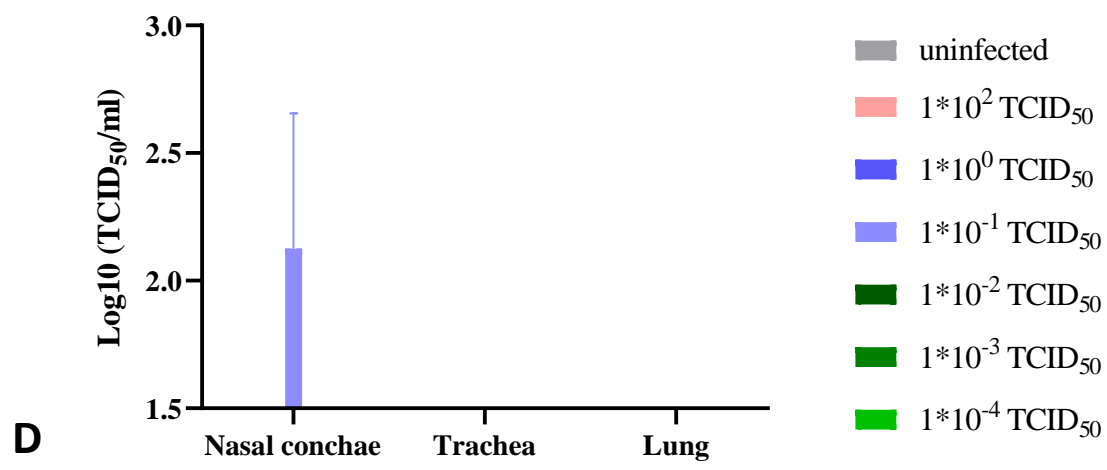

Supplementary Figure 1

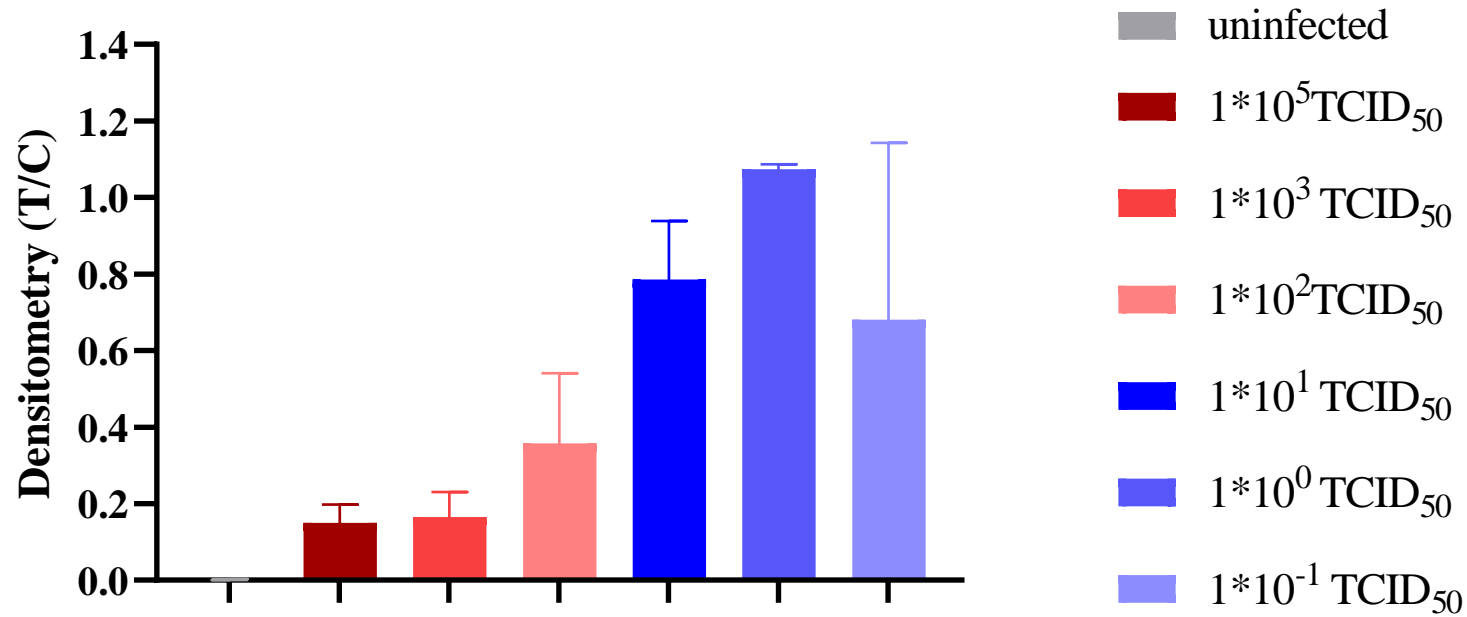

| Group     | uninfected | $1 \cdot 10^5$ TCID <sub>50</sub> | $1 \cdot 10^3$ TCID <sub>50</sub> | $1 \cdot 10^2$ TCID <sub>50</sub> | $1 \cdot 10^1$ TCID <sub>50</sub> | $1 \cdot 10^0$ TCID <sub>50</sub> | $1 \cdot 10^{-1}$ TCID <sub>50</sub> |
|-----------|------------|-----------------------------------|-----------------------------------|-----------------------------------|-----------------------------------|-----------------------------------|--------------------------------------|
| <i>N</i>  | 3          | 3                                 | 3                                 | 3                                 | 3                                 | 3                                 | 3                                    |
| Ct (SD)   | -          | 27,88 (2,68)                      | 33,04 (0)                         | 28,95 (1,65)                      | 27,13 (4,38)                      | 24,37 (1,53)                      | 27,52 (1,13)                         |
| TCID50    |            | $< 10^{1,5}$                      | $< 10^{1,5}$                      | $< 10^{1,5}$                      | $10^{1,74}$                       | $10^{2,56}$                       | $< 10^{1,5}$                         |
| TCID50 SD |            | 0                                 | 0                                 | 0                                 | $10^{1,51}$                       | $10^{1,65}$                       | 0                                    |

# Supplementary Figure 2

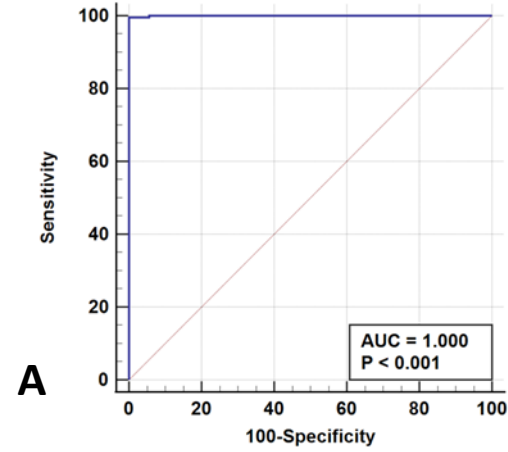

## ROC analysis

Area under the ROC curve (AUC)

|                                 |         |
|---------------------------------|---------|
| Area under the ROC curve (AUC)  | 1.000   |
| Significance level P (Area=0.5) | <0.0001 |

Criterion values and coordinates of the ROC curve

| Criterion | Sensitivity | Specificity |
|-----------|-------------|-------------|
| ≤14.11    | 99.56       | 100         |

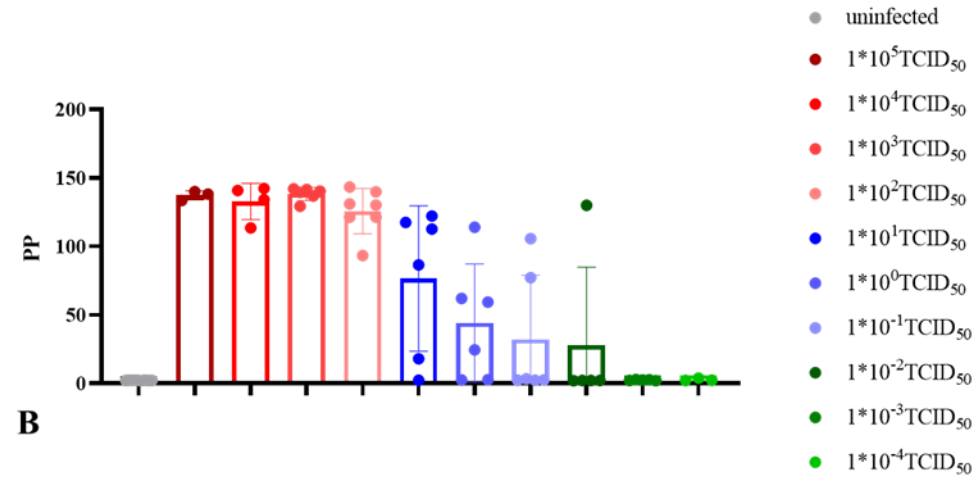

Source: https://www.biorxiv.org/content/10.1101/2022.04.19.488826v1.full.pdf
